# Supplementary material for: I2-Triggered N–O cleavage of ketoxime acetates for the synthesis of 3-(4-pyridyl)indoles
Source: Royal Society of Chemistry journal article supplement (doi:10.1039/c8ob02230e), 2018-01-01

## Supporting Information

### I<sub>2</sub>-Triggered N-O Cleavage of Ketoxime Acetates for the Synthesis of 3-(4-Pyridyl)indoles

Qinghe Gao,<sup>\*a</sup> Yakun Wang,<sup>a</sup> Qianqian Wang,<sup>b</sup> Yanping Zhu,<sup>c</sup> Zhaomin Liu,<sup>a</sup> and Jixia Zhang<sup>a</sup>

<sup>a</sup>*School of Pharmacy, Xinxiang Medical University, Xinxiang, Henan 453003, P. R. China.*

E-mail: gao\_qinghe@xxmu.edu.cn

<sup>b</sup>*School of International education, Xinxiang Medical University, Xinxiang, Henan 453003, P. R. China.*

<sup>c</sup>*School of Pharmacy, Key Laboratory of Molecular Pharmacology and Drug Evaluation, Ministry of Education, Collaborative Innovation Center of Advanced Drug Delivery System and Biotech Drugs in Universities of Shandong, Yantai University, Shandong, Yantai 264005, P. R. China.*

| <b>Table of Contents</b>                                                                   | <b>page</b> |
|--------------------------------------------------------------------------------------------|-------------|
| 1. The cross-coupling reaction .....                                                       | S2          |
| 2. Crystallographic data and molecular structure of <b>3o</b> .....                        | S3          |
| 3. <sup>1</sup> H and <sup>13</sup> C NMR spectra of compounds <b>3</b> and <b>5</b> ..... | S4-S35      |



## 2. Crystallographic data and molecular structure of compounds 3o

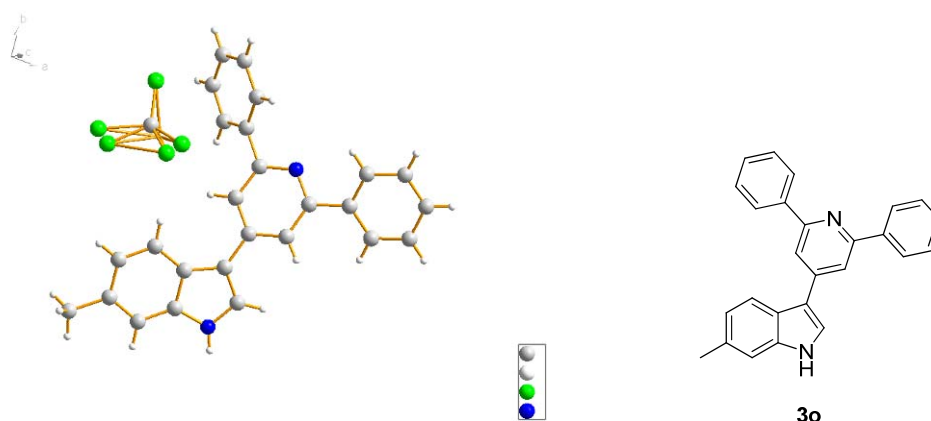

**Figure S1.** X-ray crystal structure of **3o** (CCDC: 1844843)

|                      |                                                                                                                                            |                    |                                   |                                             |
|----------------------|--------------------------------------------------------------------------------------------------------------------------------------------|--------------------|-----------------------------------|---------------------------------------------|
| Empirical formula    | C <sub>53</sub> H <sub>41</sub> Cl <sub>3</sub> N <sub>4</sub><br>[2(C <sub>26</sub> H <sub>20</sub> N <sub>2</sub> ), CHCl <sub>3</sub> ] |                    | Absorption coefficient            | 2.210 mm <sup>-1</sup>                      |
| Formula weight       | 840.25                                                                                                                                     |                    | F(000)                            | 1752                                        |
| Temperature          | 293(2) K                                                                                                                                   |                    | Crystal size                      | 0.220 x 0.200 x 0.180 mm <sup>3</sup>       |
| Wavelength           | 1.54178 Å                                                                                                                                  |                    | Theta range for data collection   | 3.536 to 74.902°                            |
| Crystal system       | Monoclinic                                                                                                                                 |                    | Reflections collected             | 8719                                        |
| Space group          | C2/c                                                                                                                                       |                    | Independent reflections           | 4174 [R(int) = 0.0231]                      |
| Unit cell dimensions | a =<br>25.4646(15) Å                                                                                                                       | α = 90°            | Refinement method Full            | Full-matrix least-squares on F <sup>2</sup> |
|                      | b =<br>16.7733(9) Å                                                                                                                        | β =<br>100.998(6)° | Data / restraints / parameters    | 4174 / 30 / 290                             |
|                      | c =<br>10.4497(8) Å                                                                                                                        | γ = 90°            | Goodness-of-fit on F <sup>2</sup> | 1.071                                       |
| Volume               | 4381.4(5) Å <sup>3</sup>                                                                                                                   |                    | Final R indices [I > 2σ(I)]       | R1 = 0.0801, wR2 = 0.2265                   |
| Z                    | 4                                                                                                                                          |                    | R indices (all data)              | R1 = 0.0900, wR2 = 0.2487                   |
| Density (calculated) | 1.274 Mg/m <sup>3</sup>                                                                                                                    |                    | Largest diff. peak and hole       | 0.504 and -0.682 e.Å <sup>-3</sup>          |

### 3. $^1\text{H}$ and $^{13}\text{C}$ NMR spectra of compounds 3 and 5

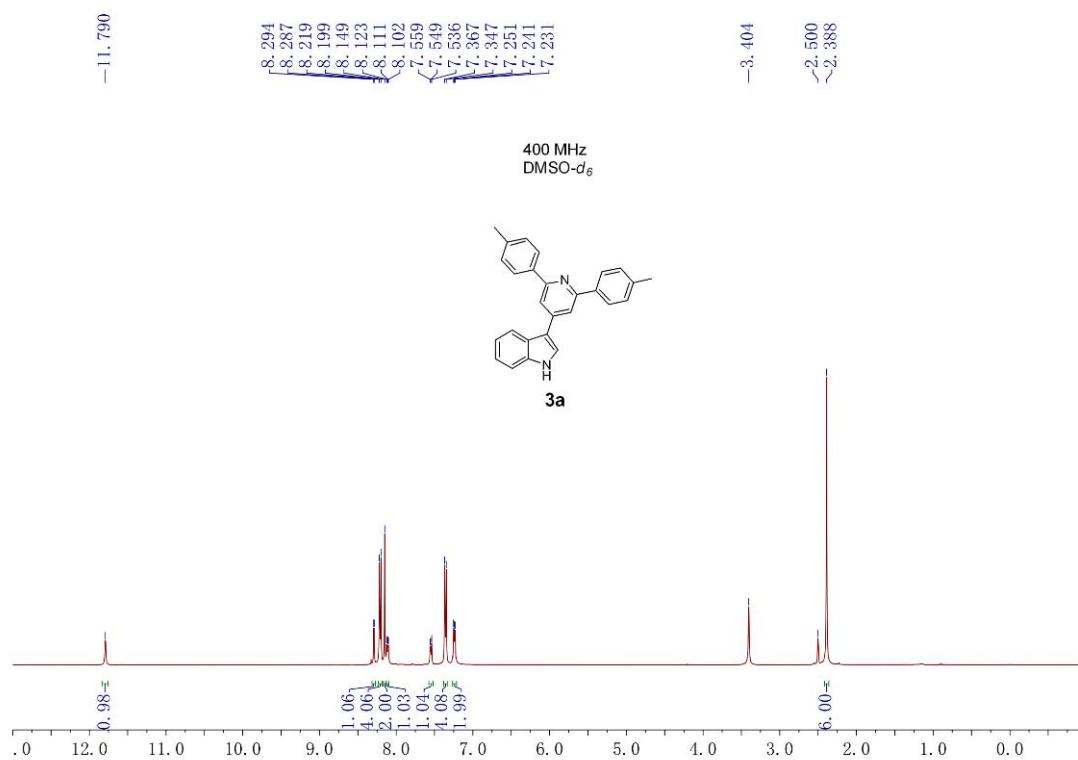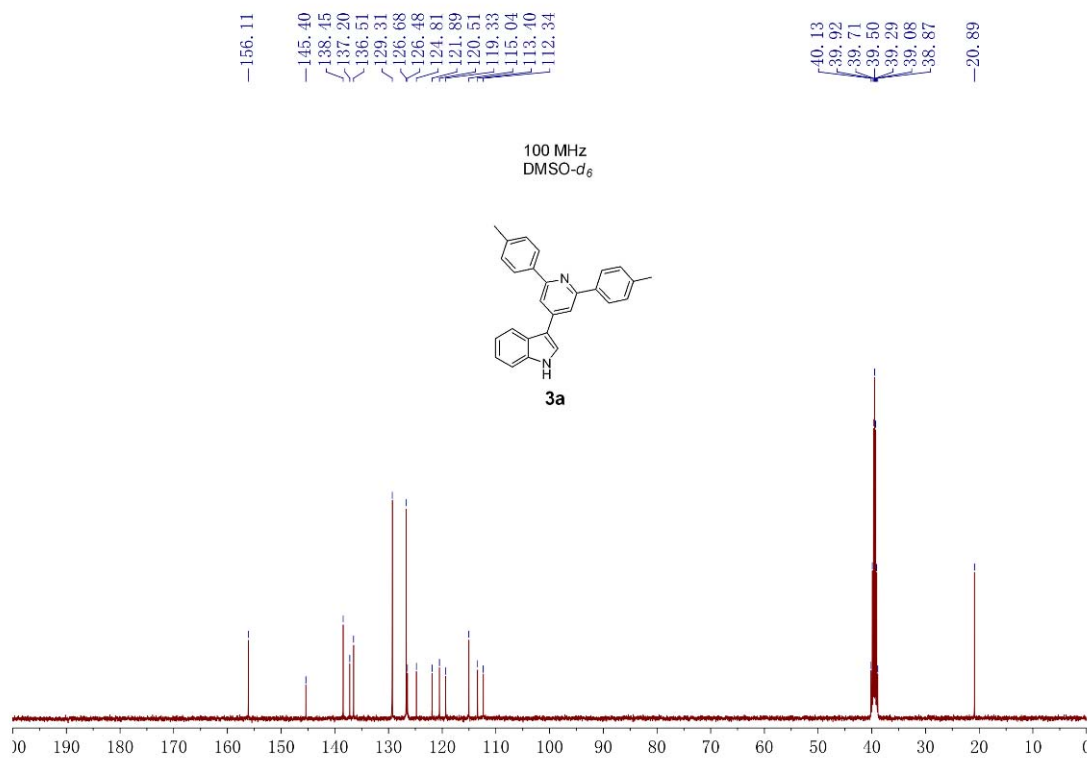

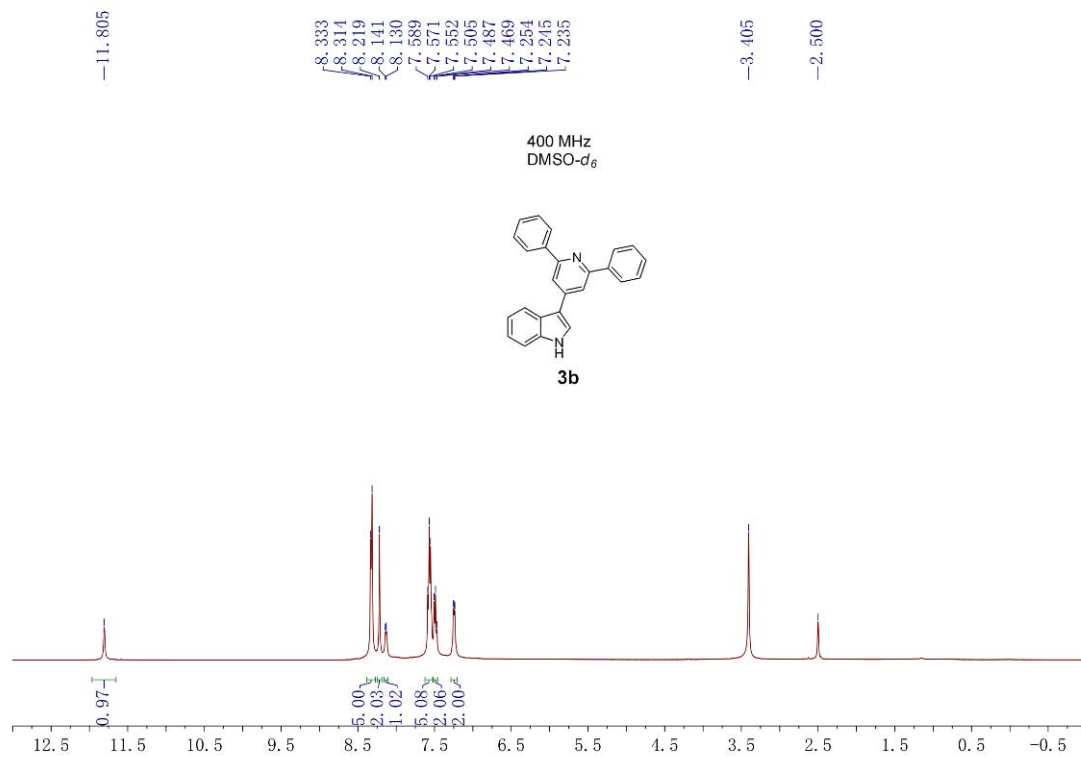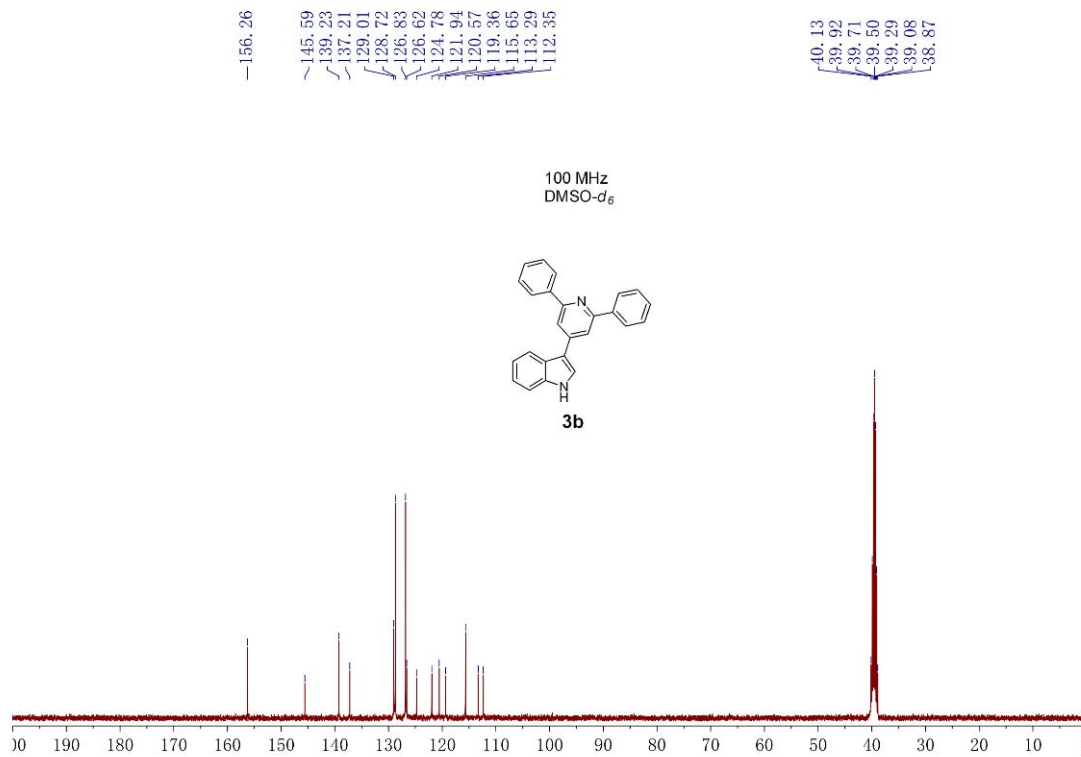

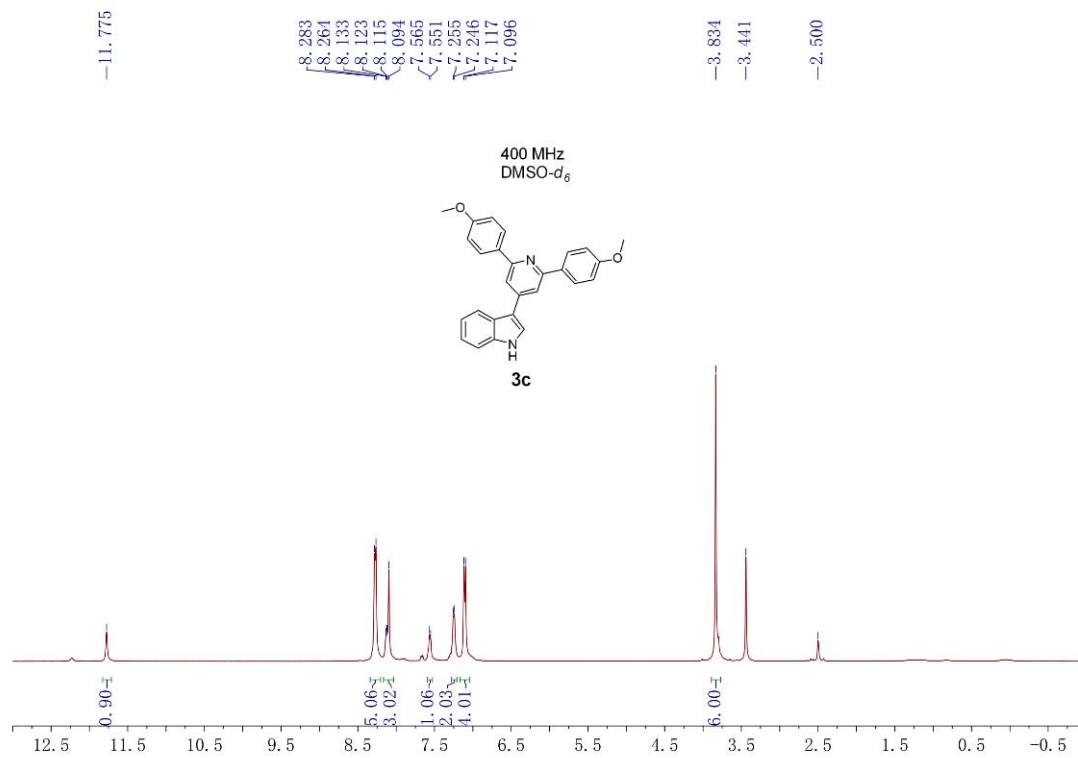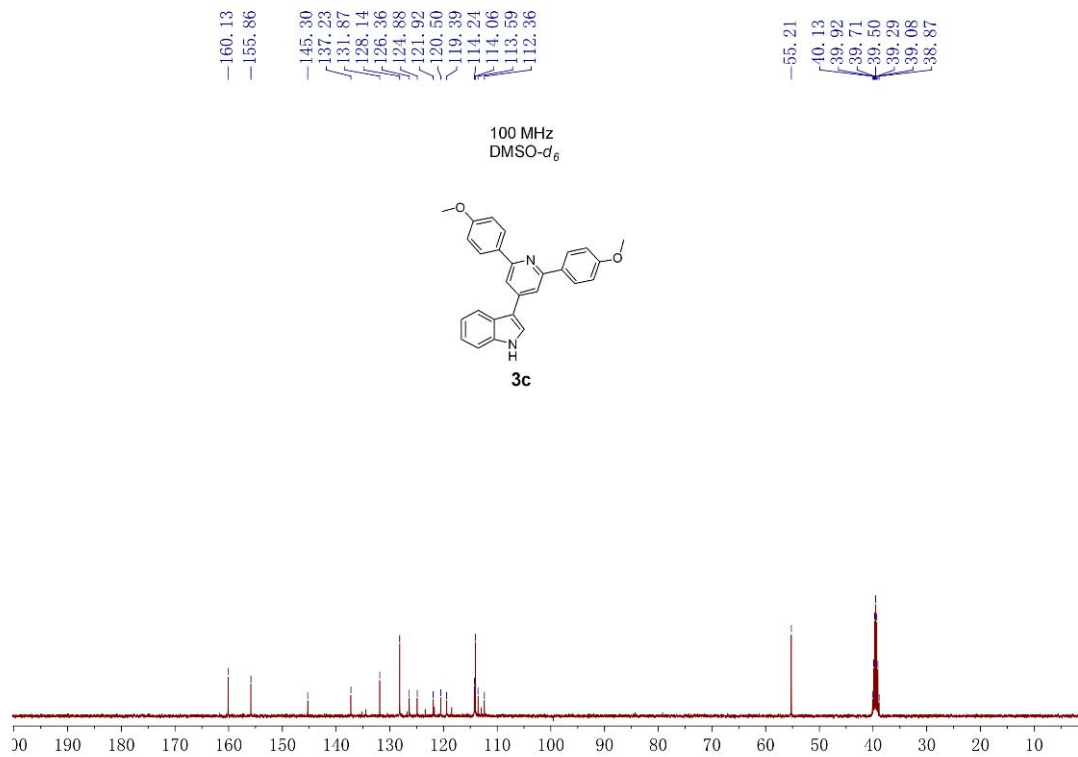

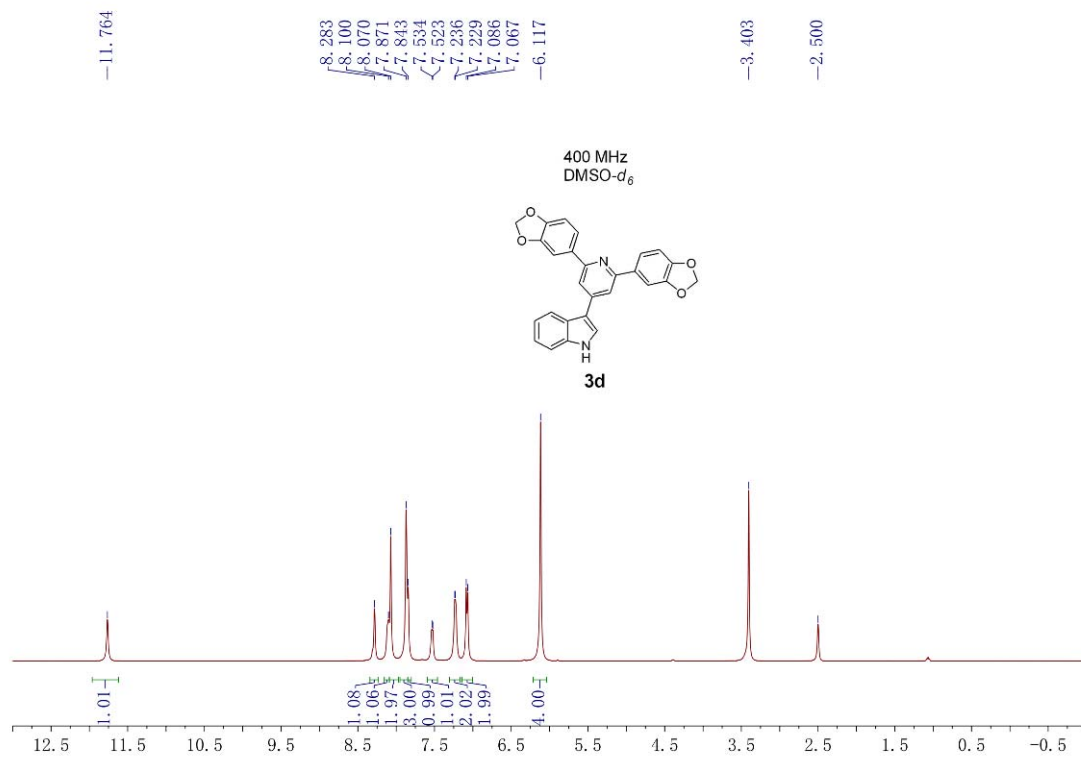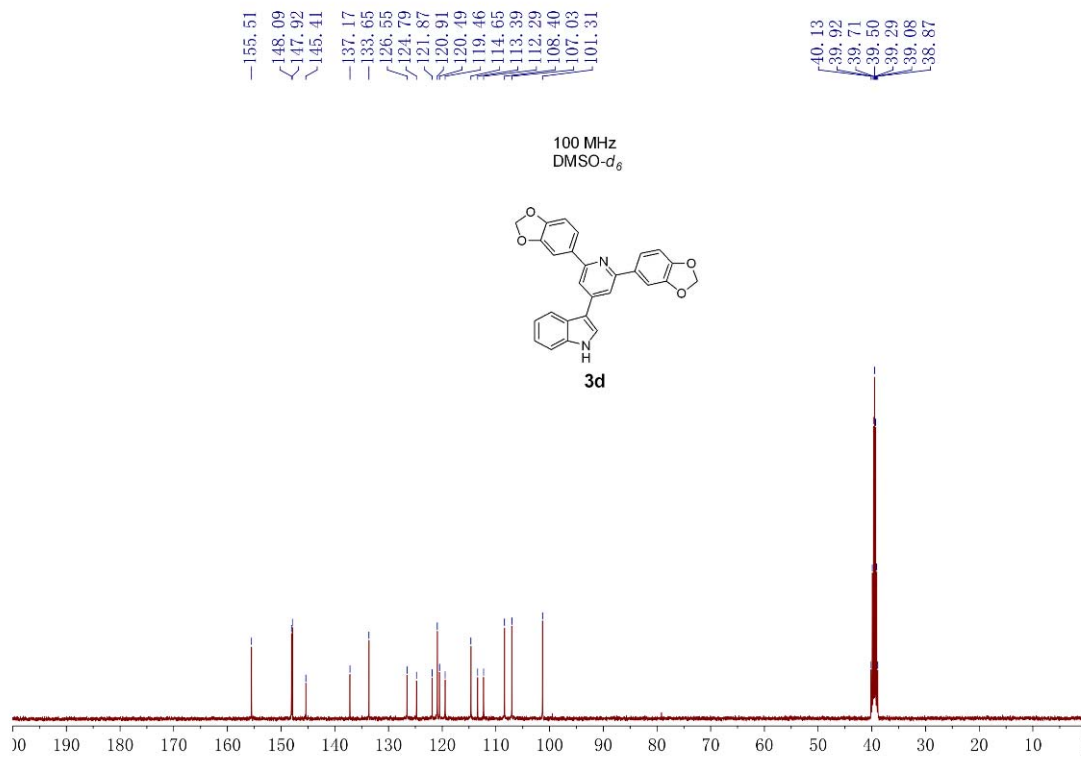

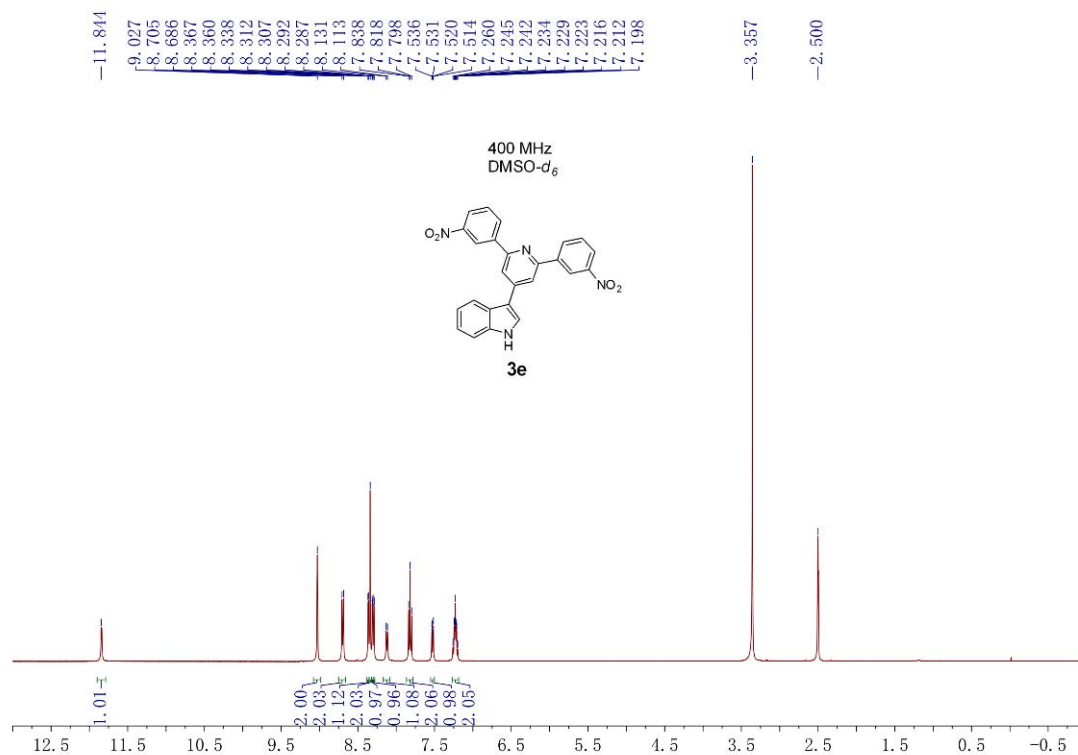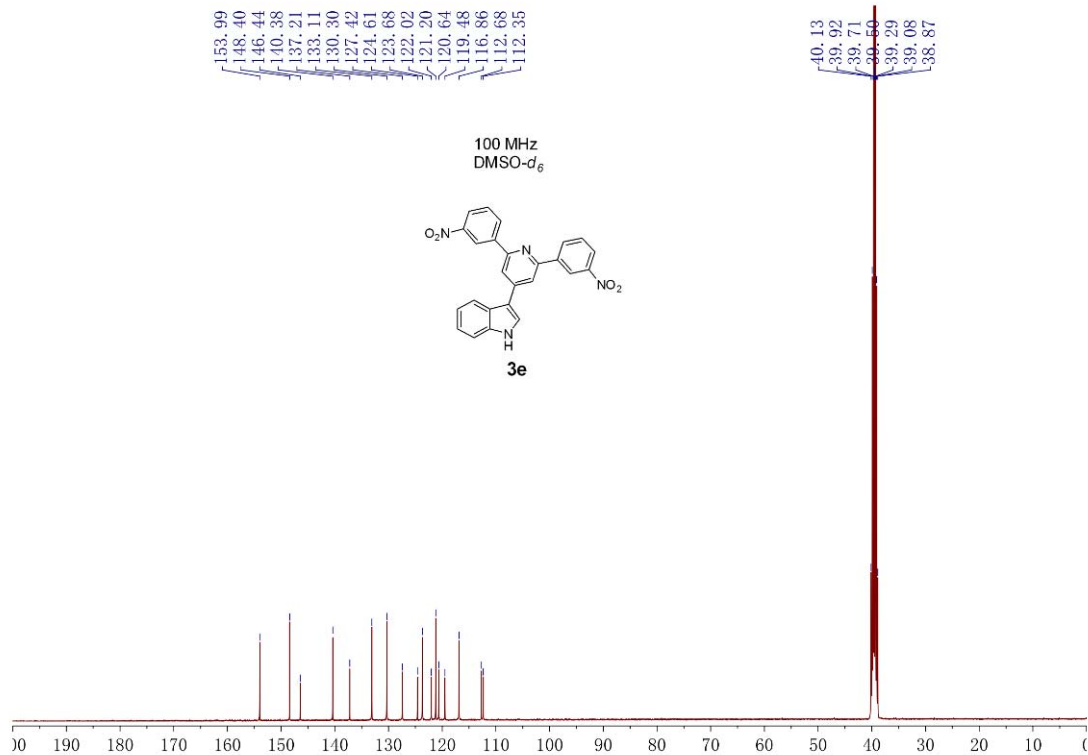



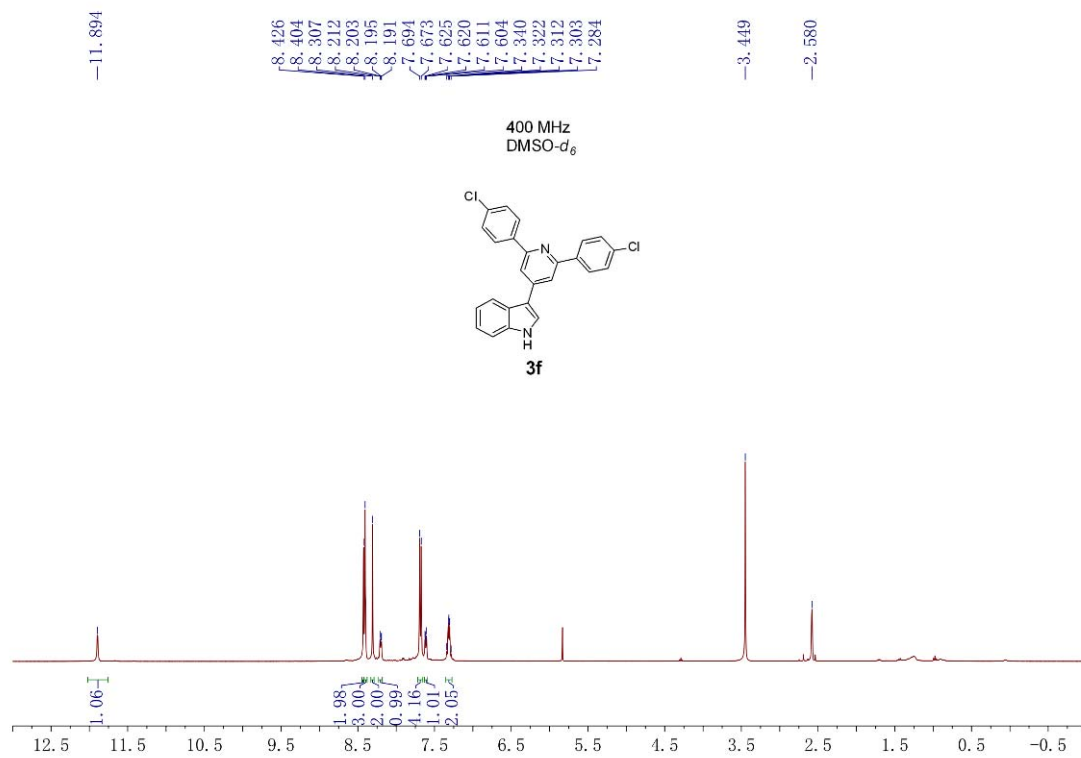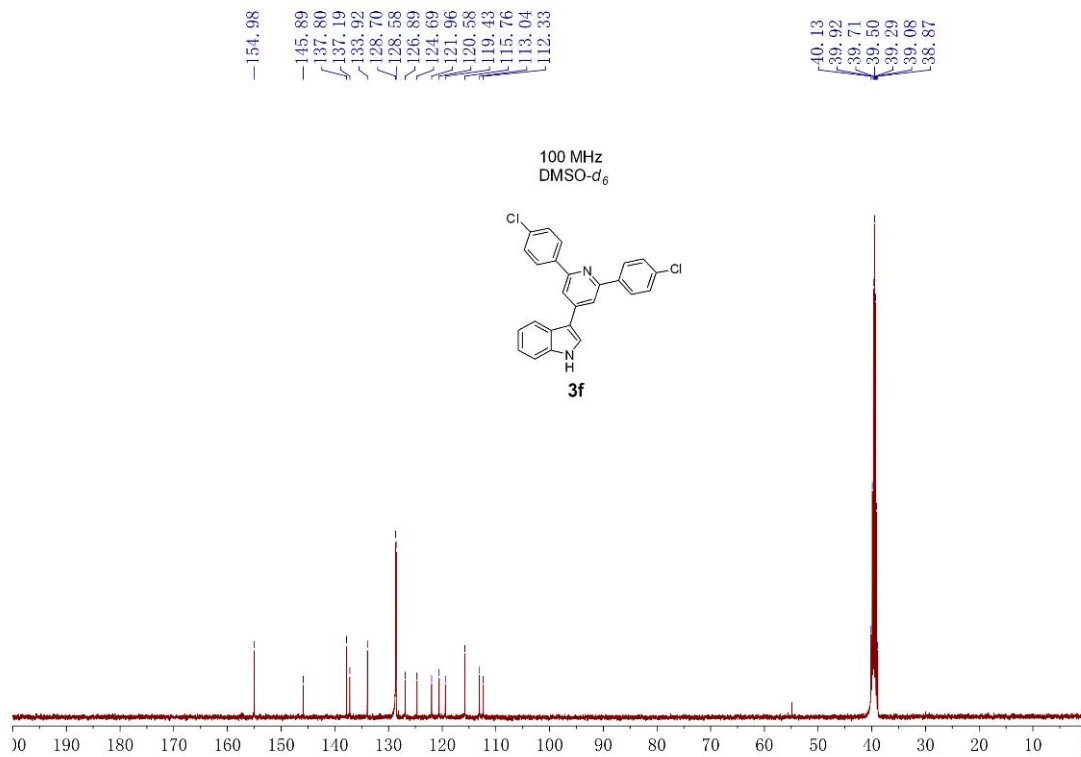

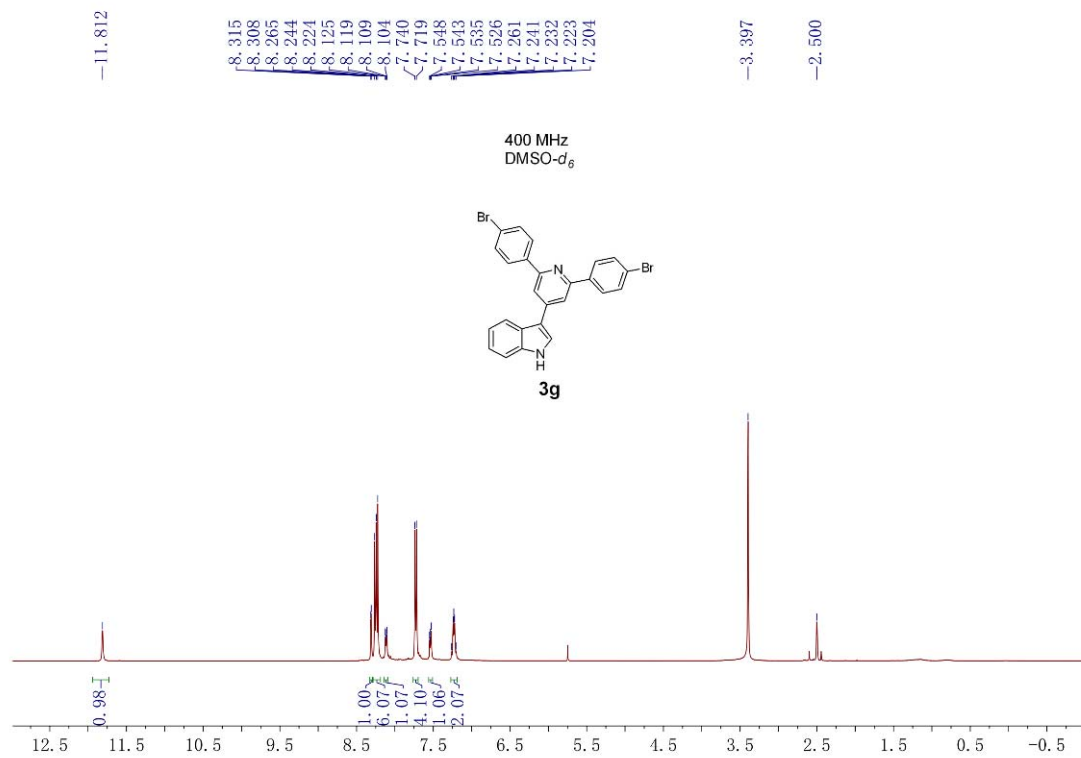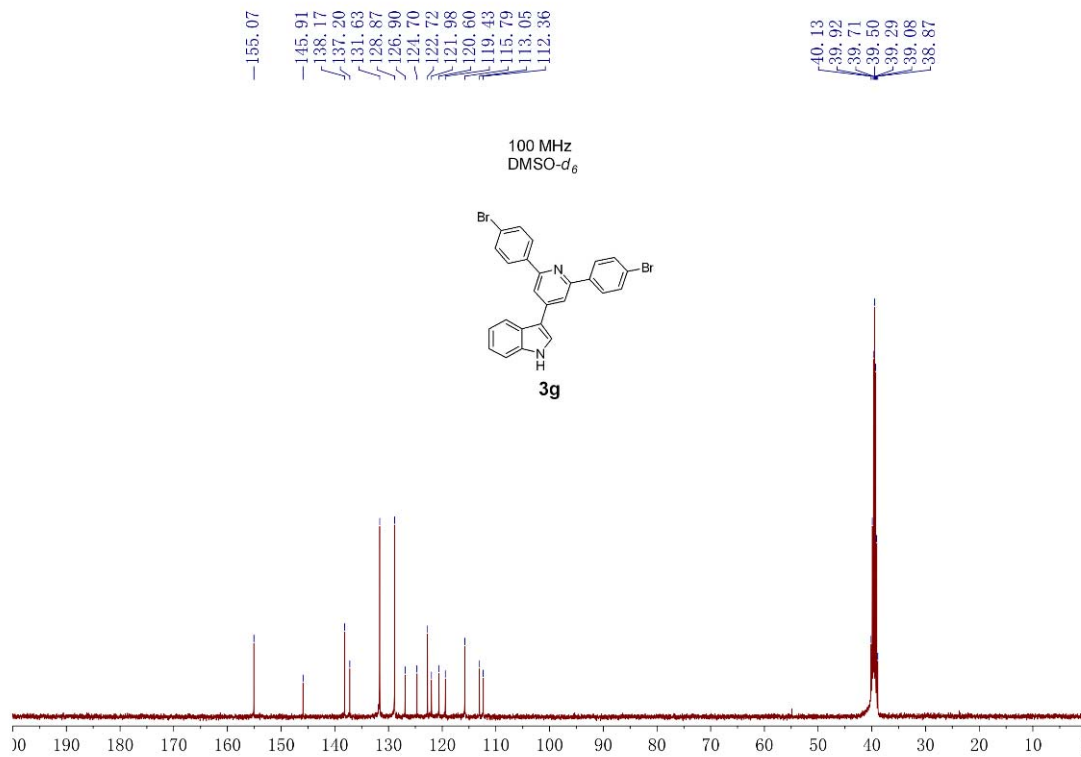

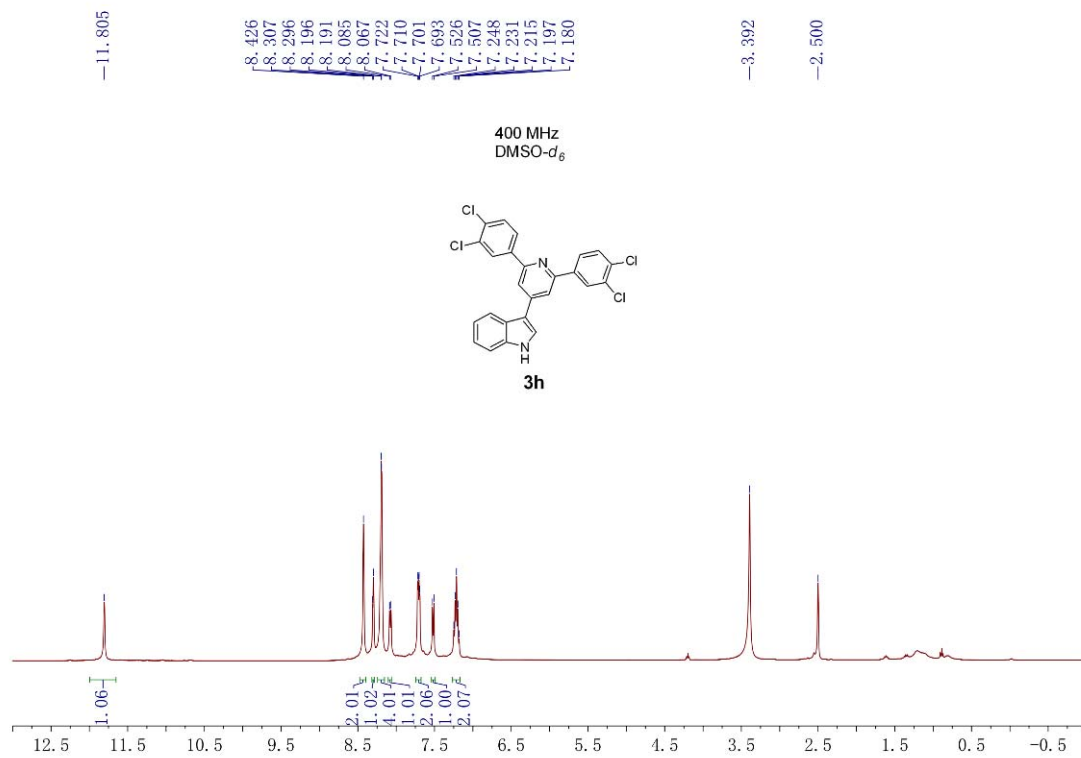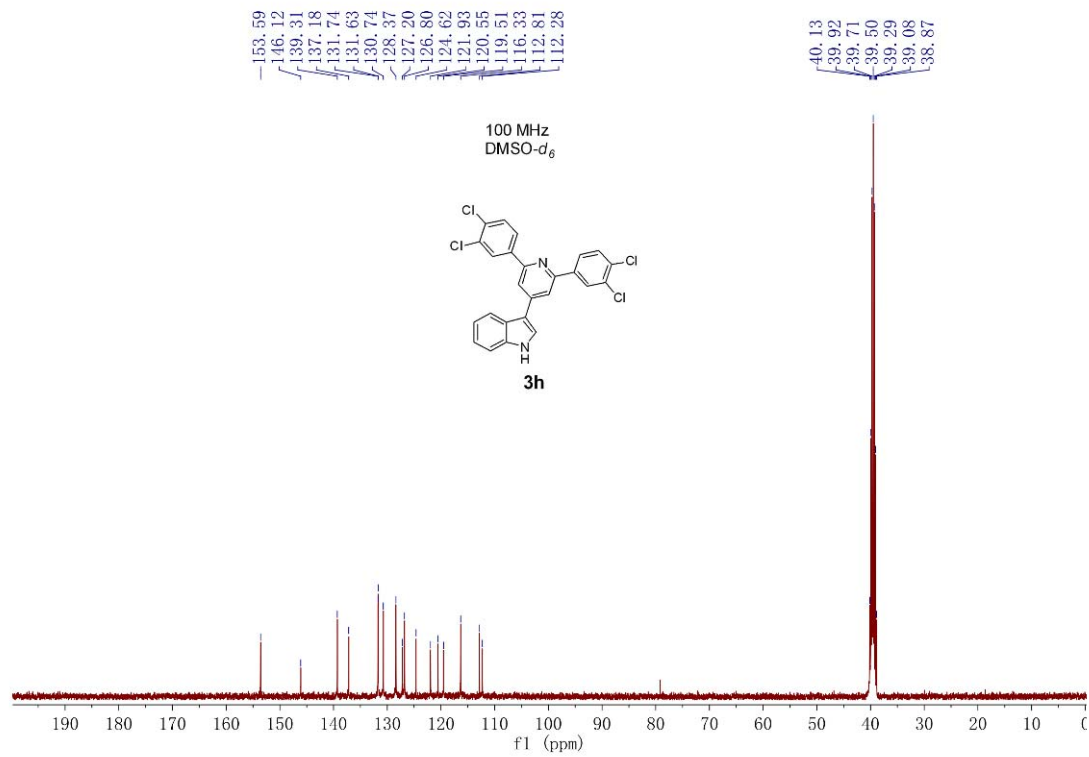

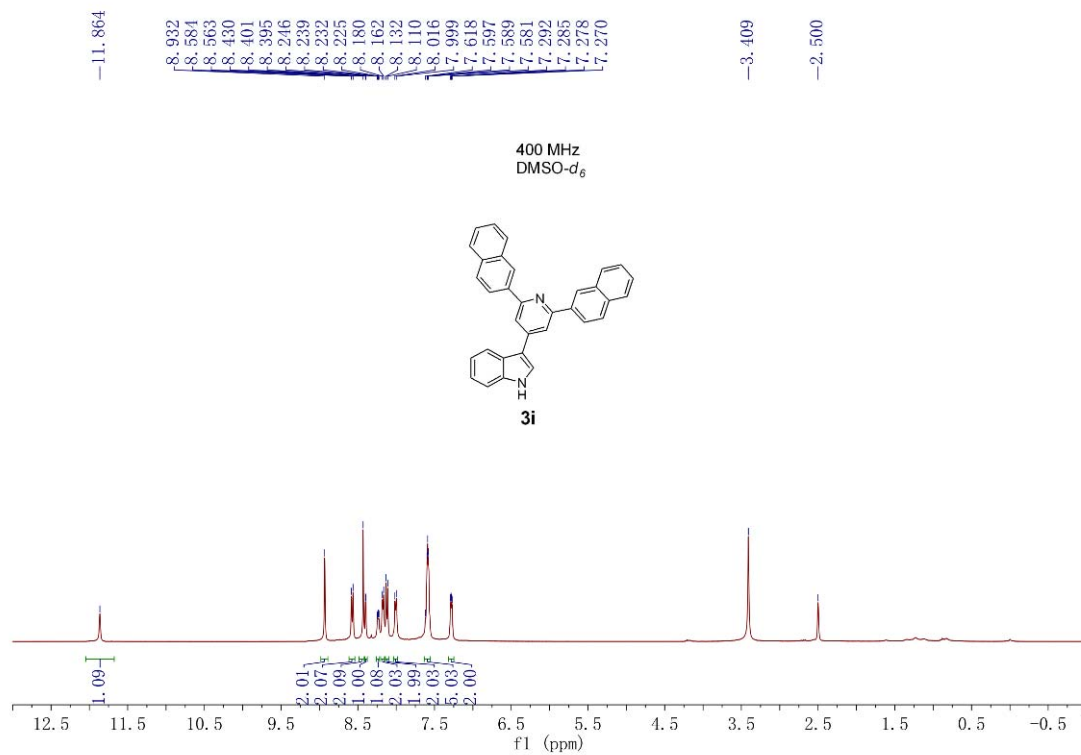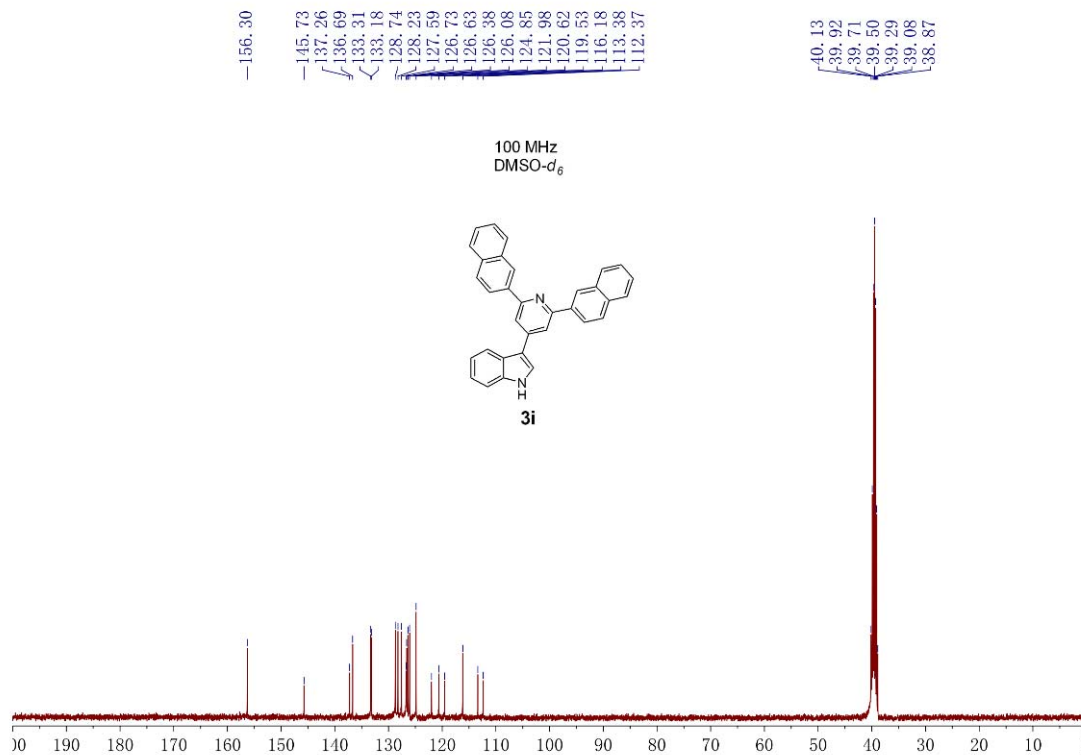

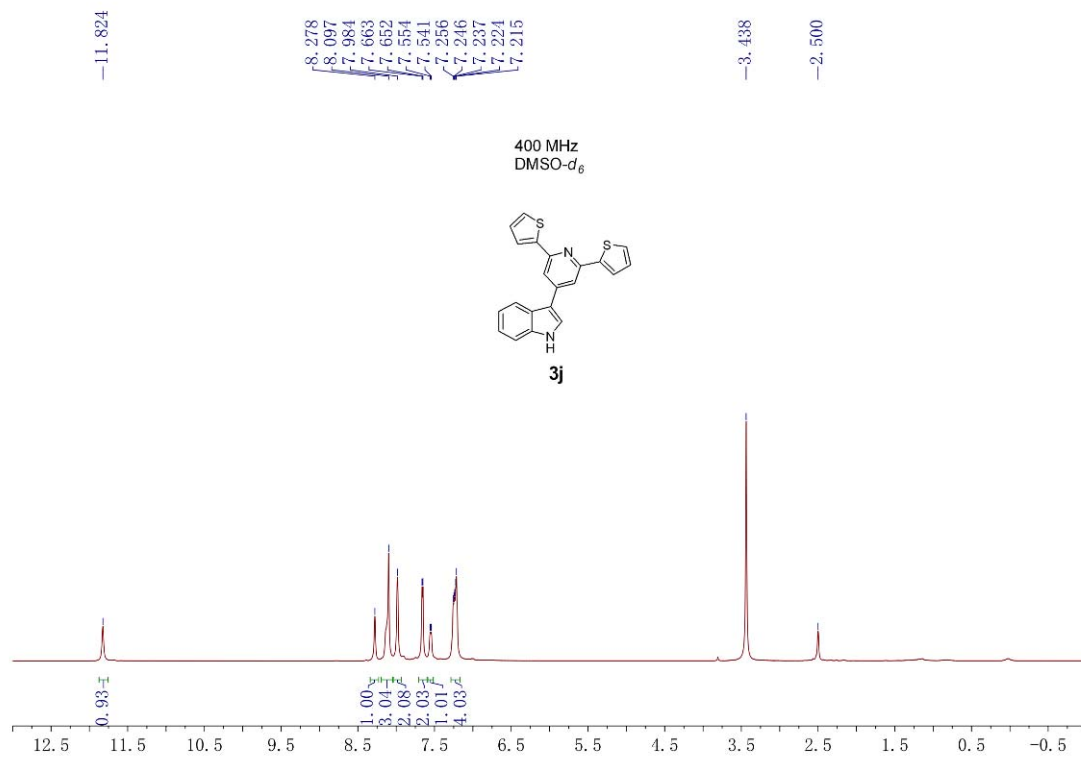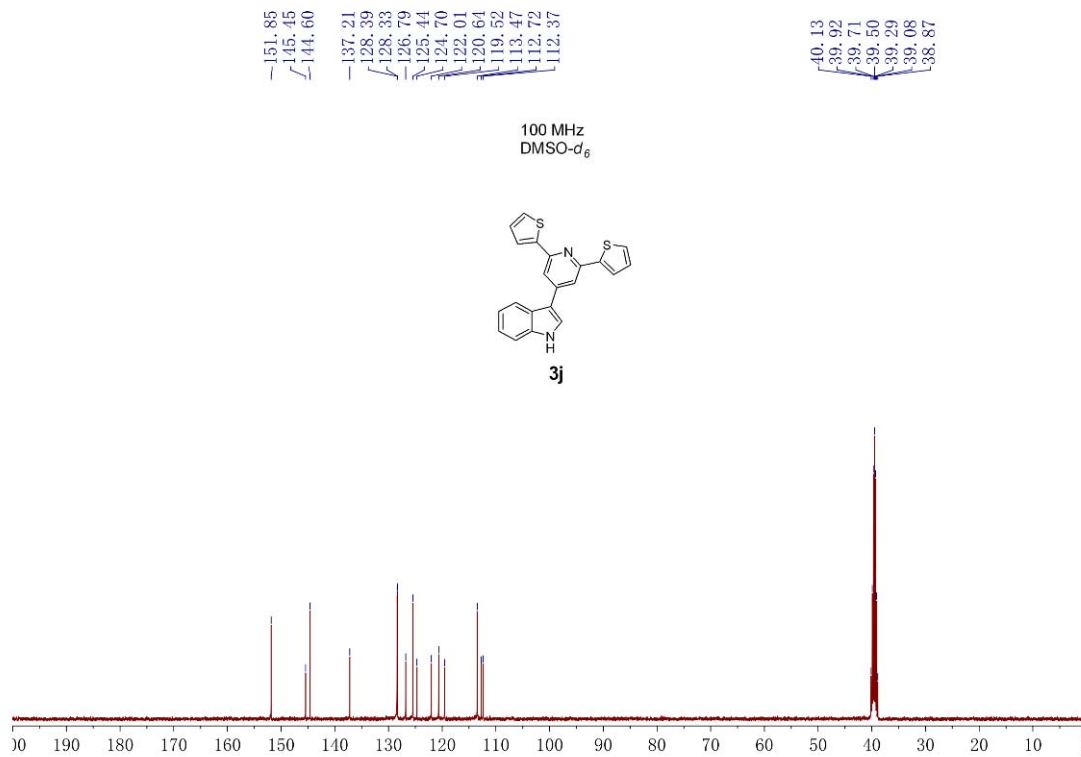

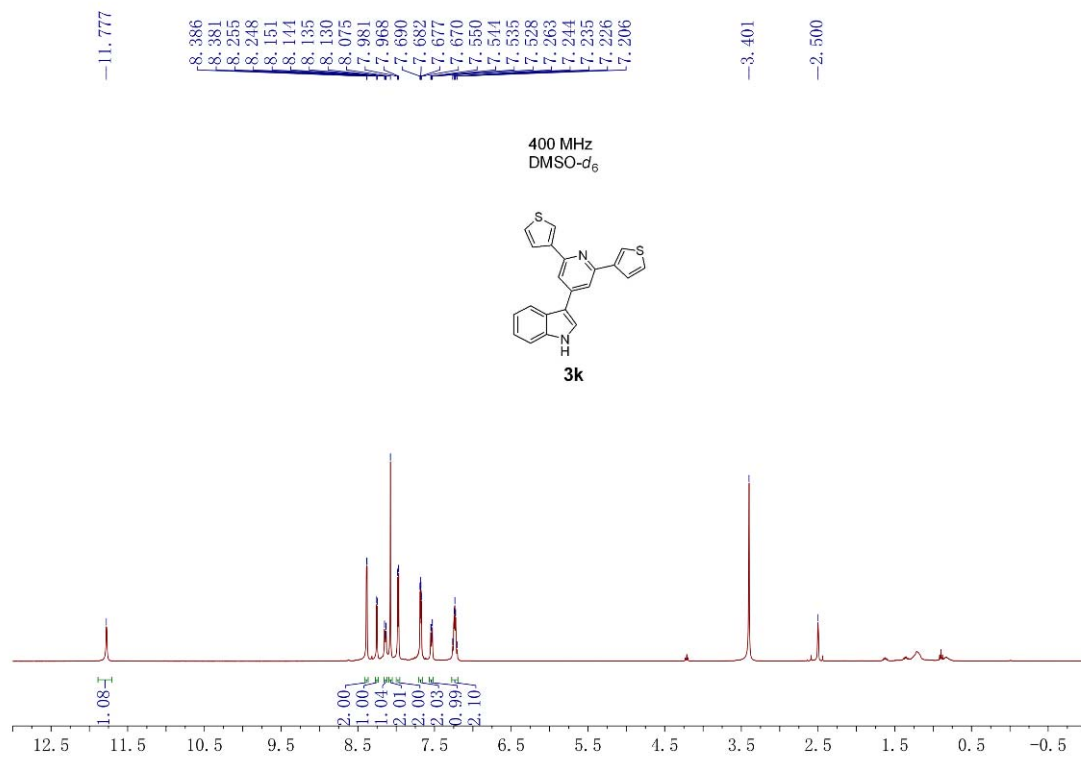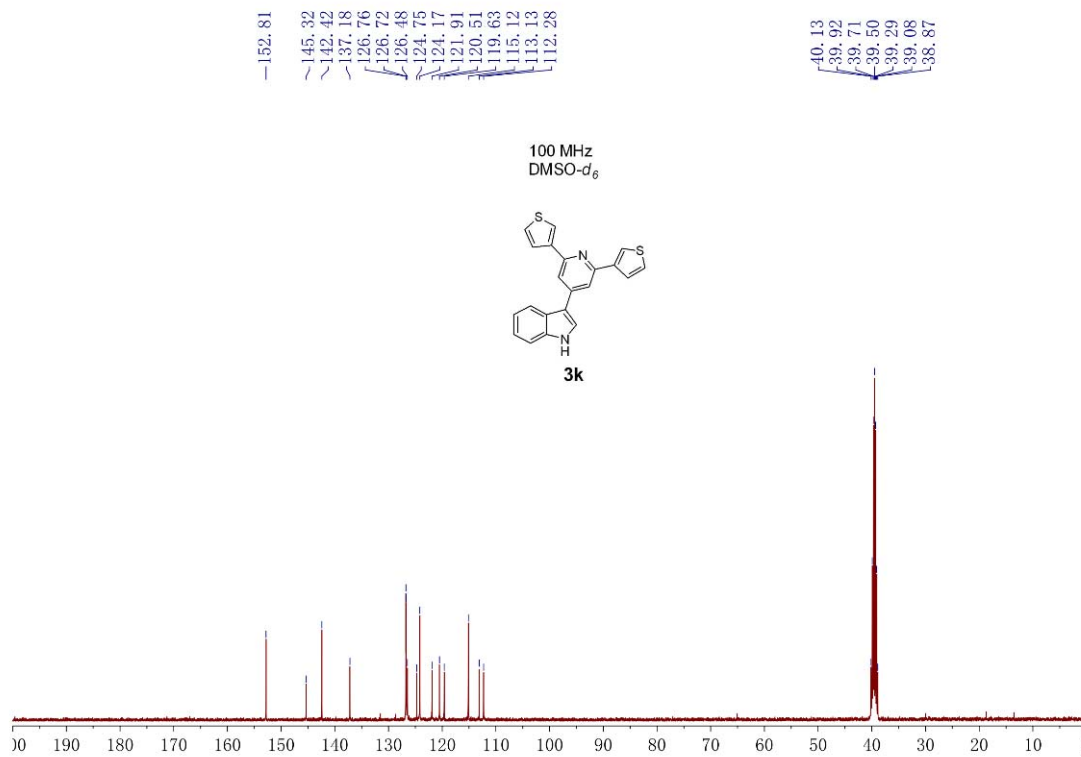

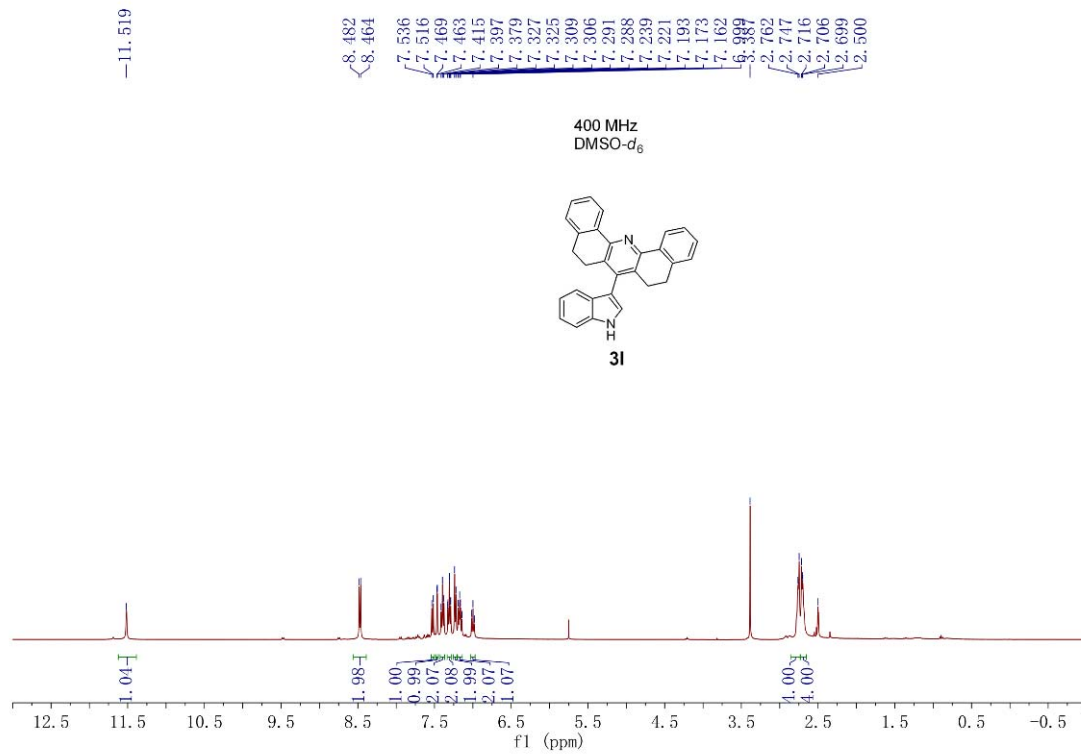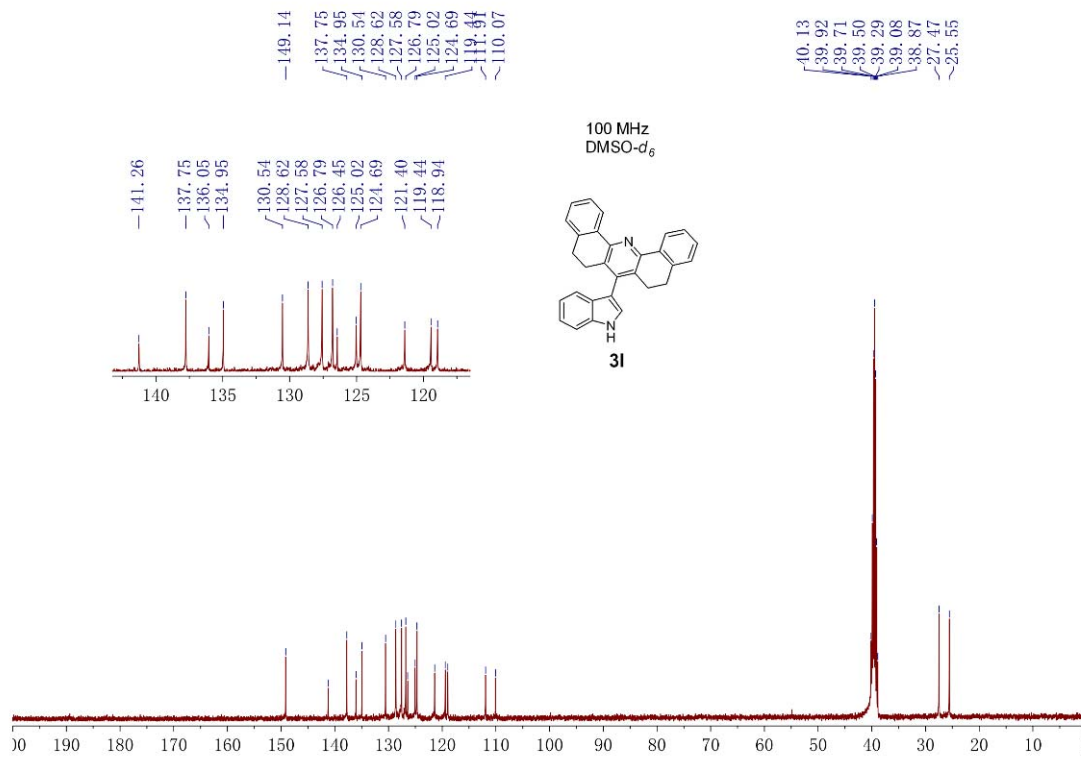

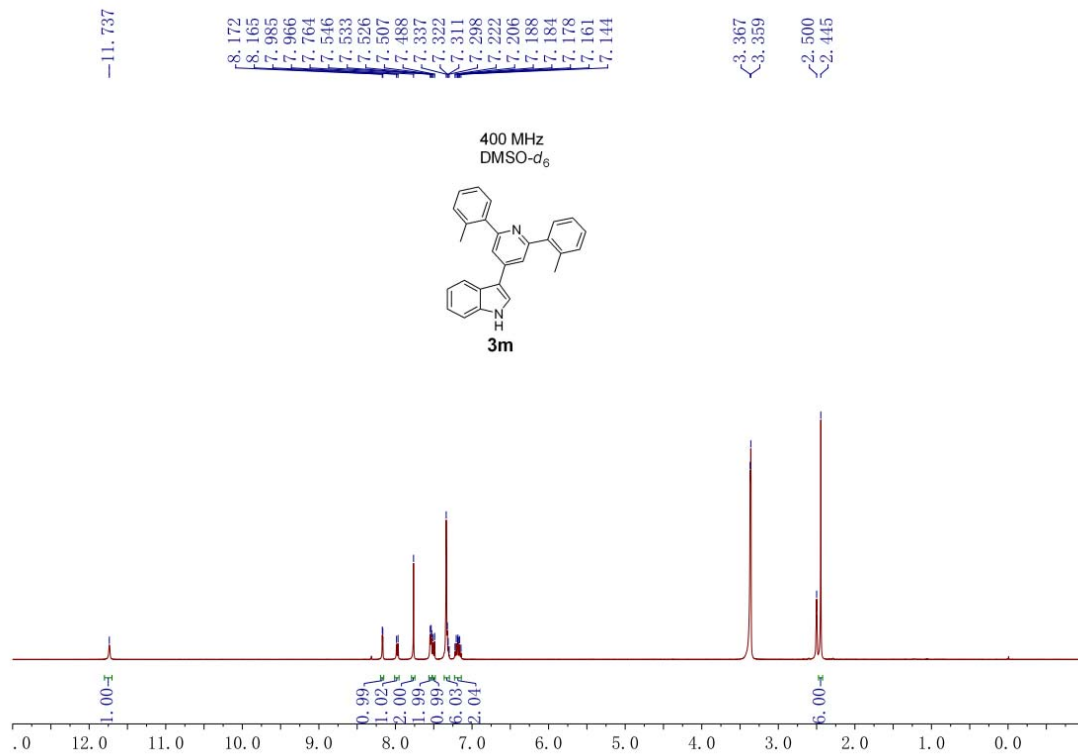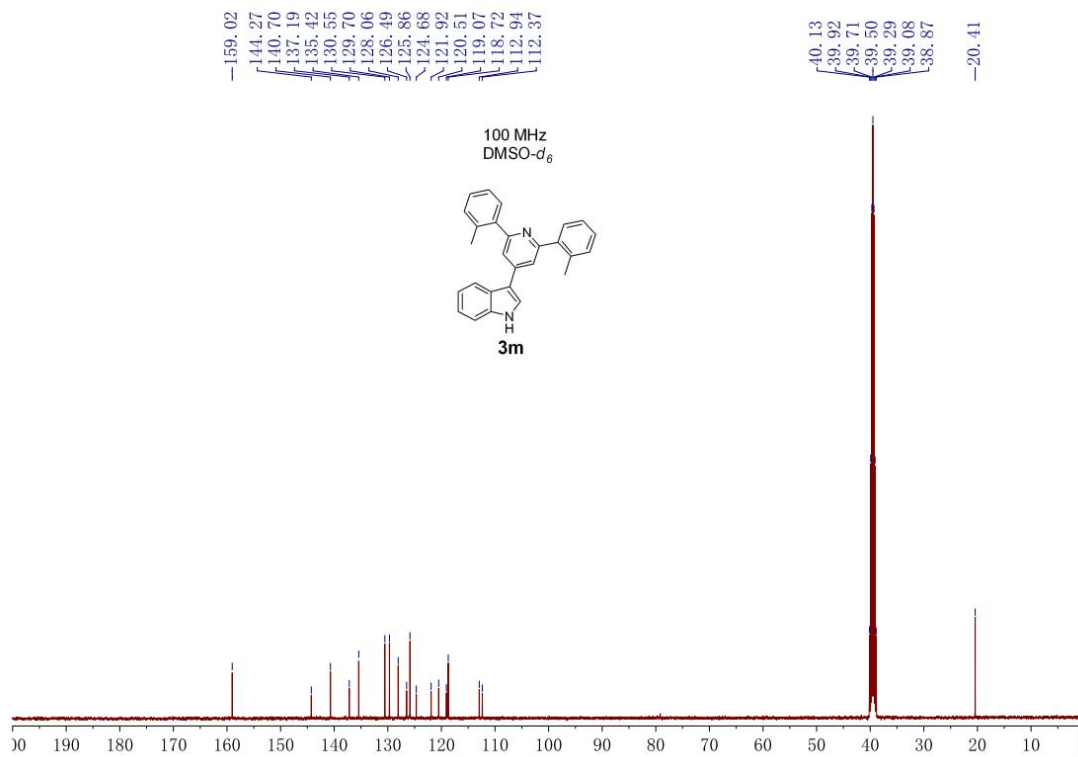





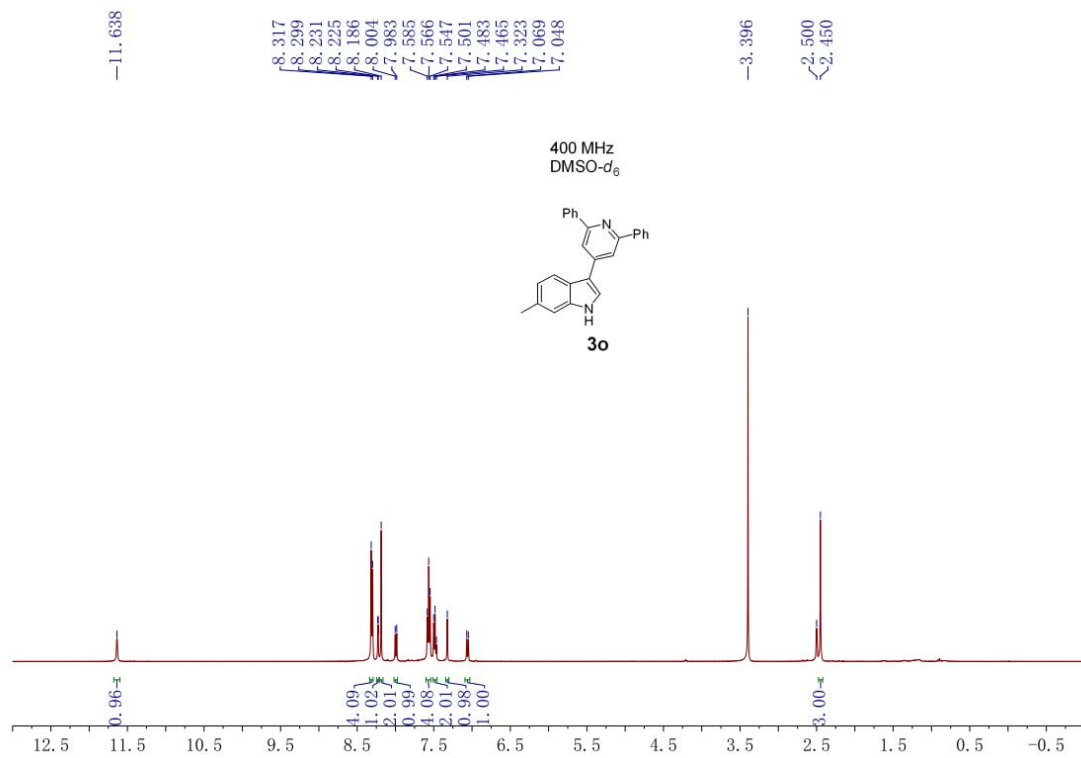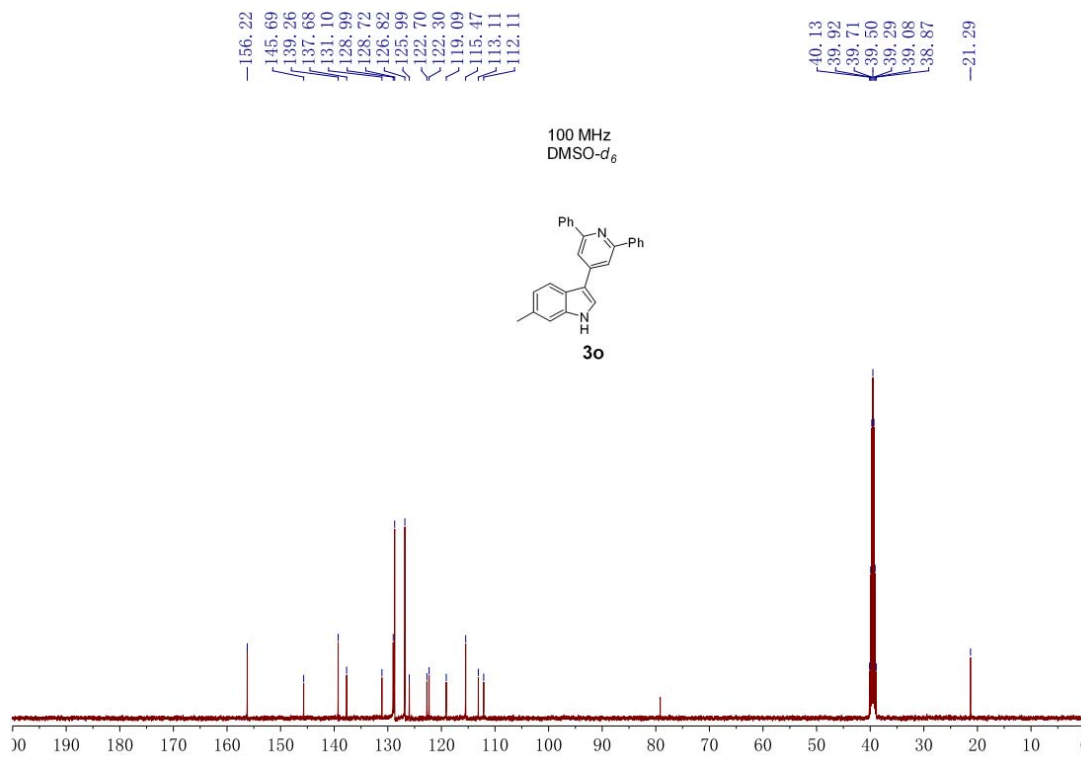

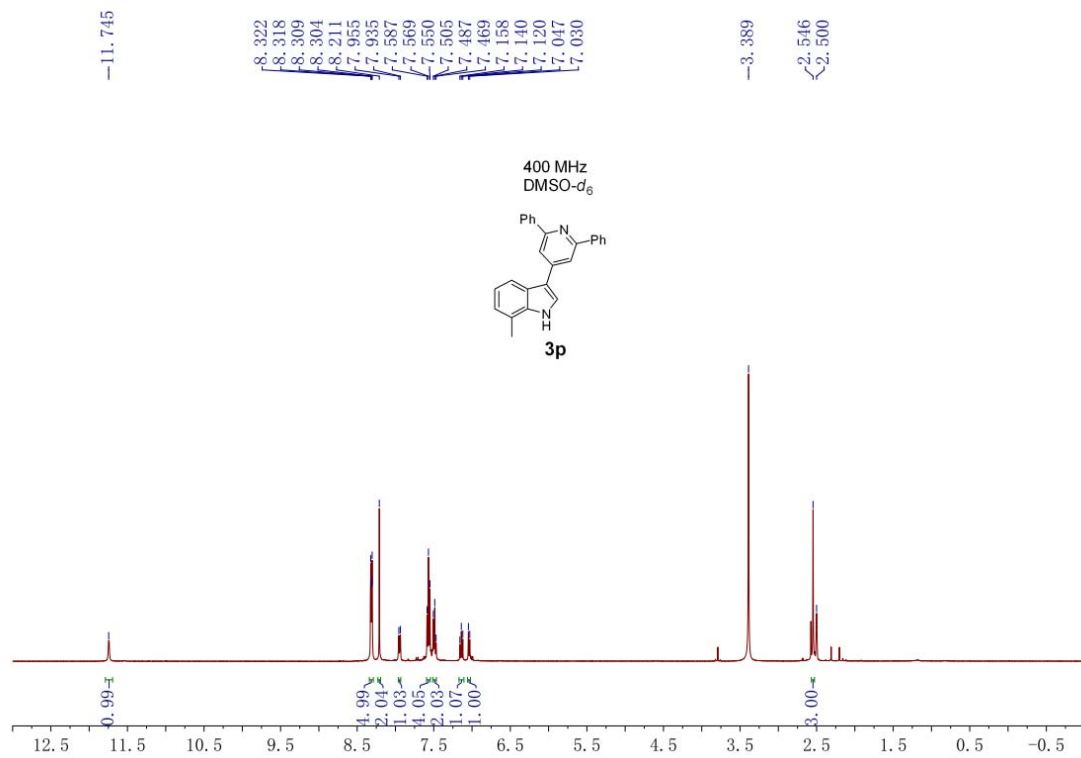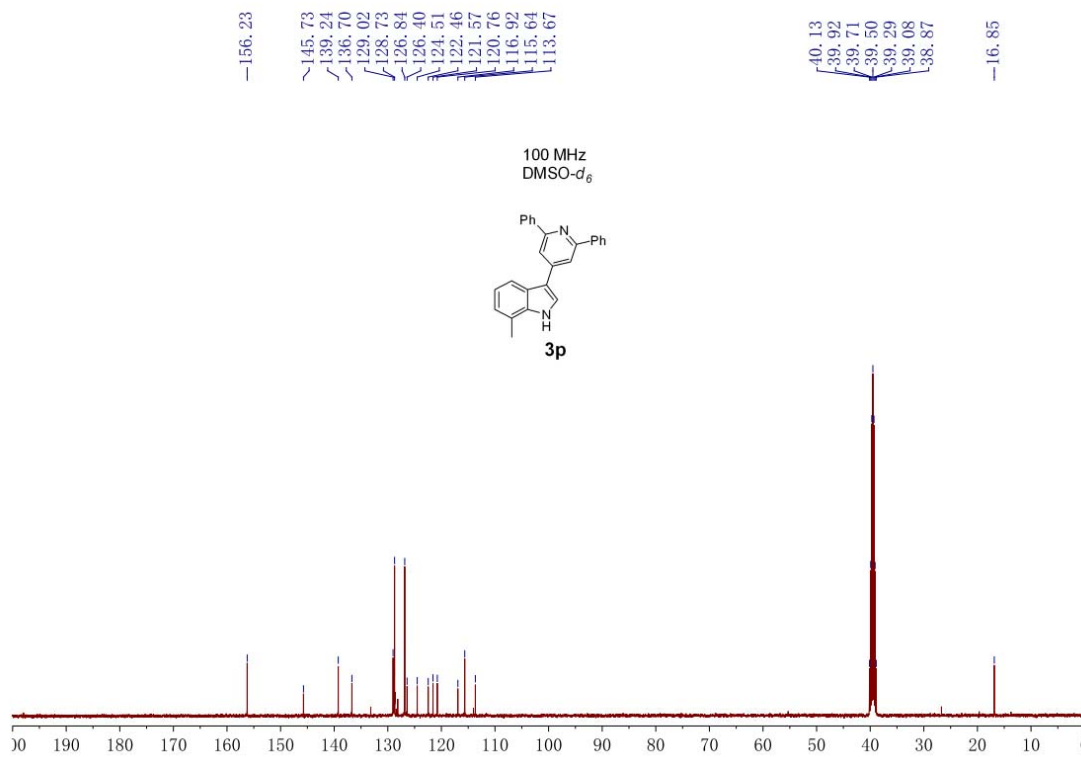

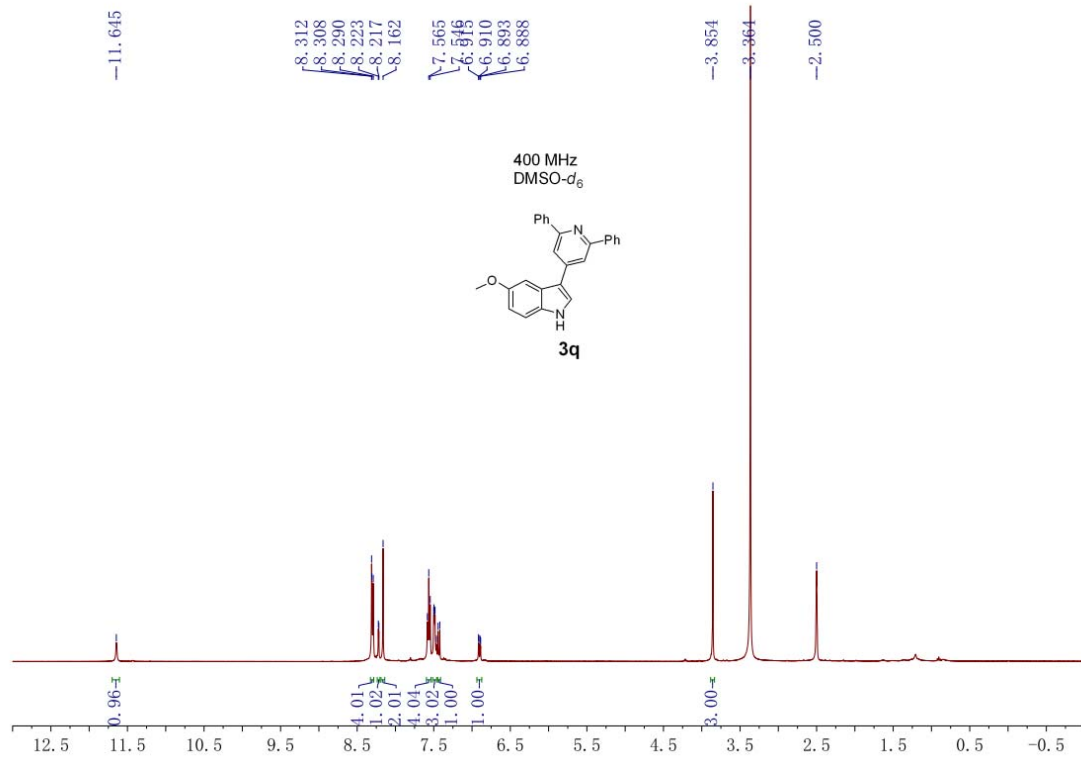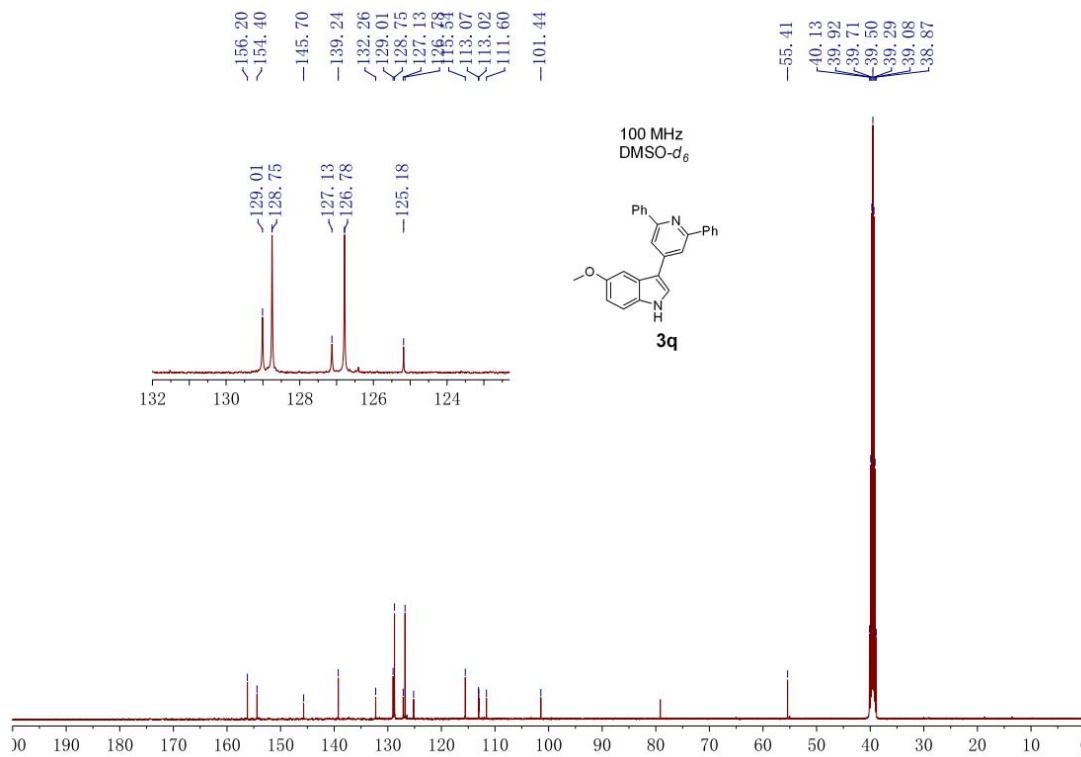

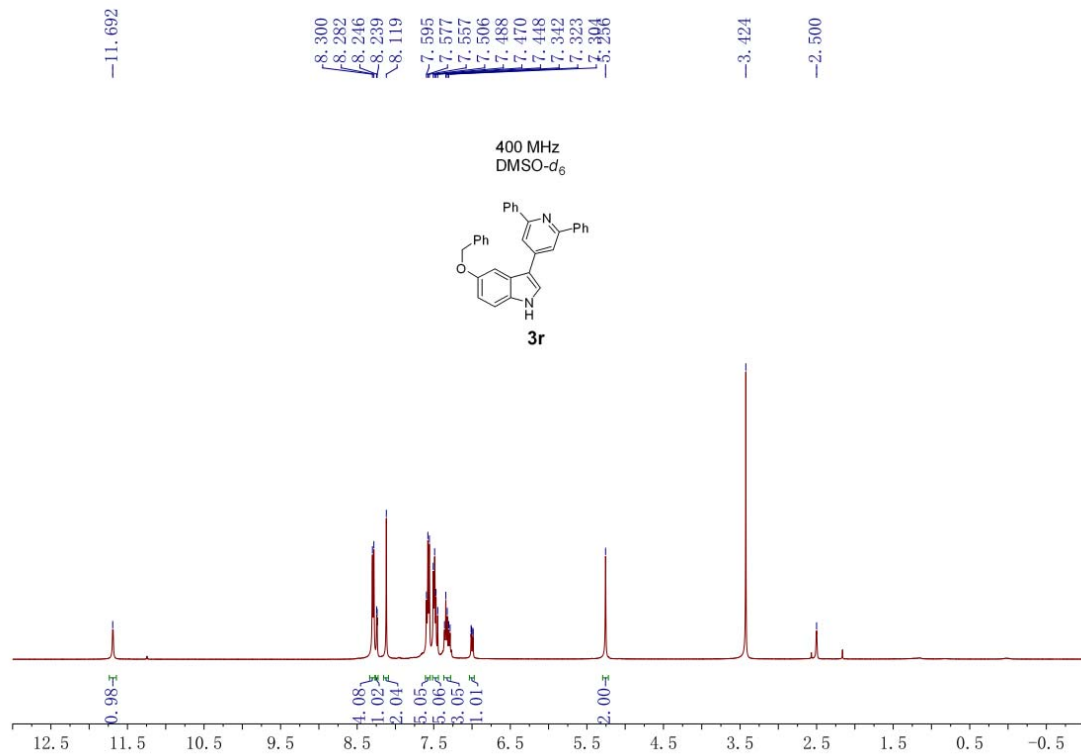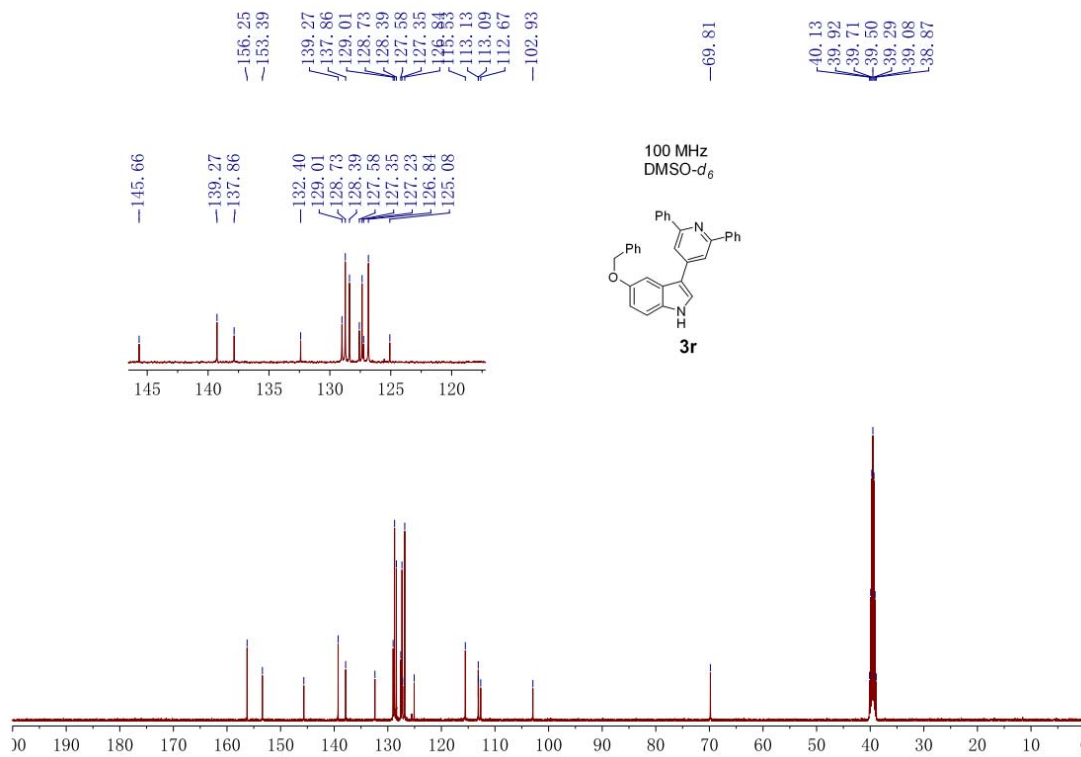

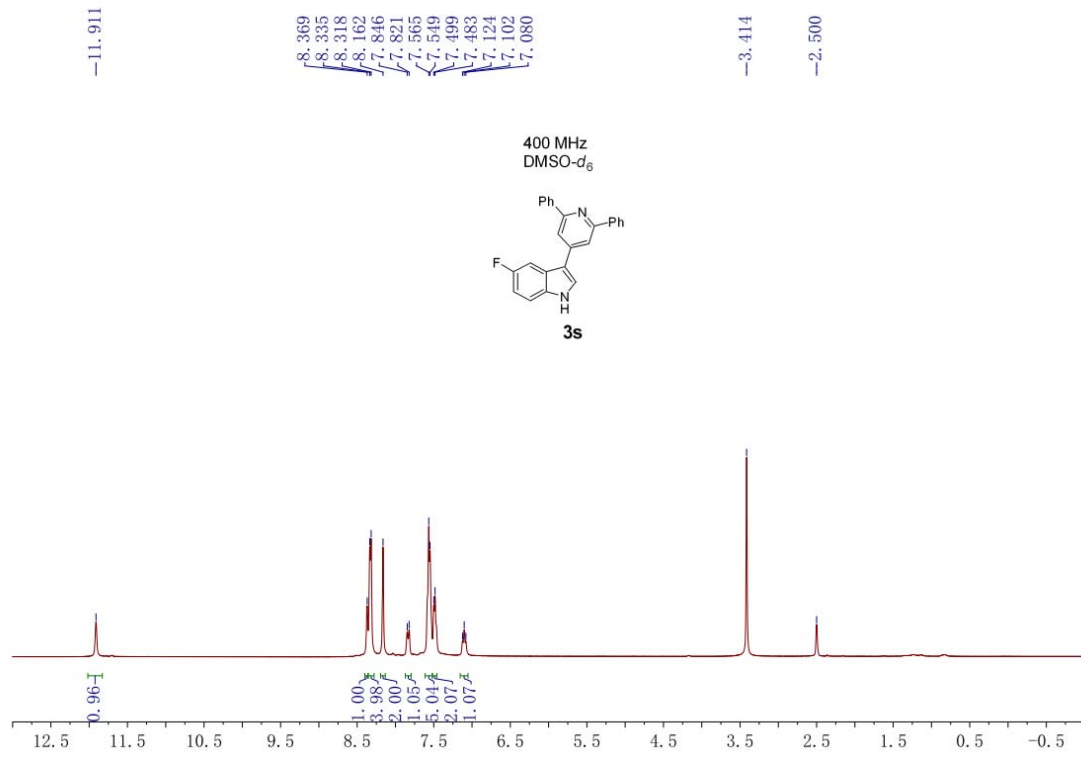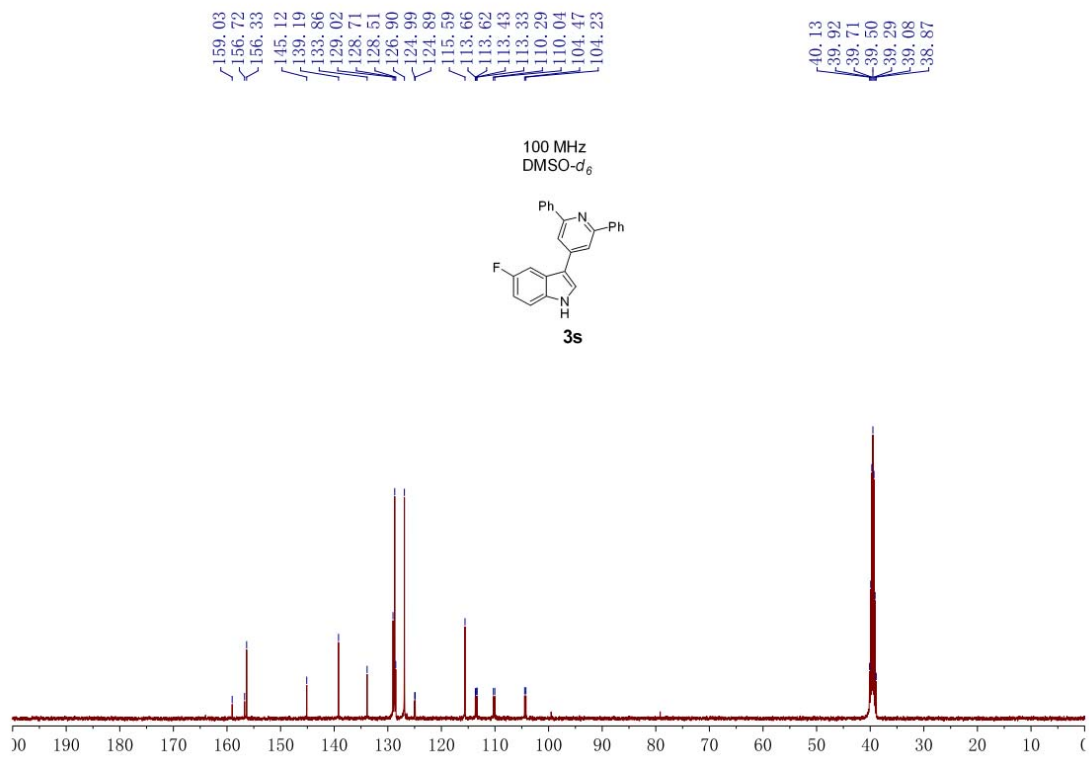

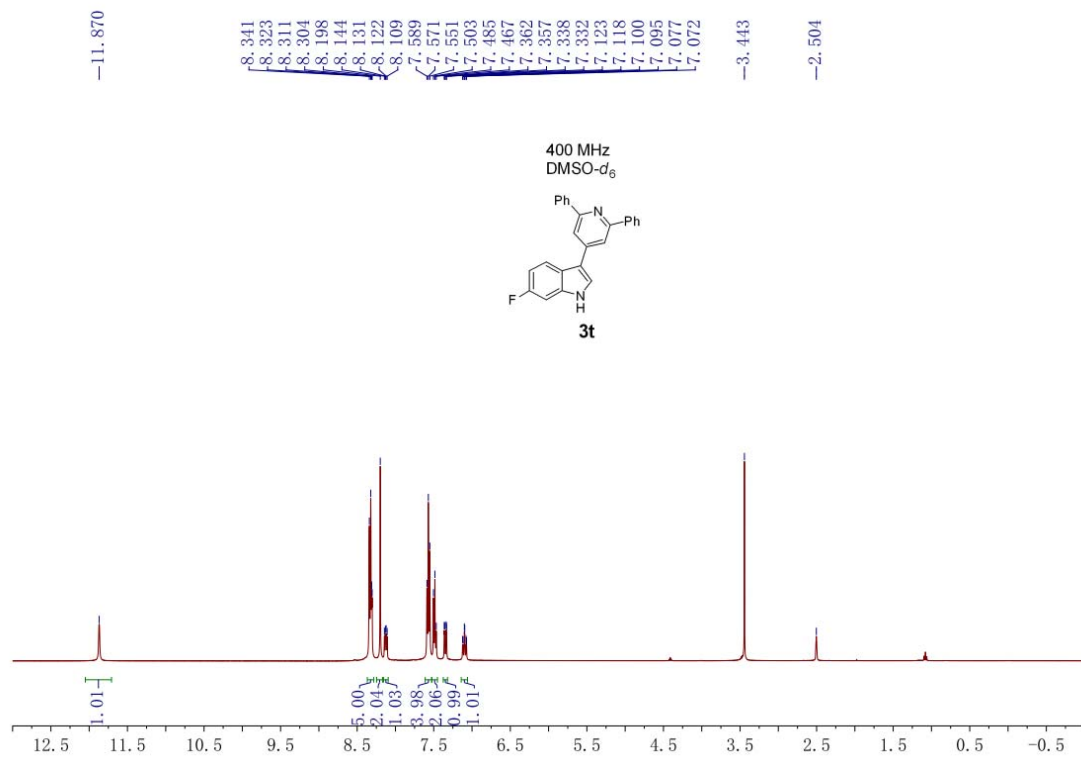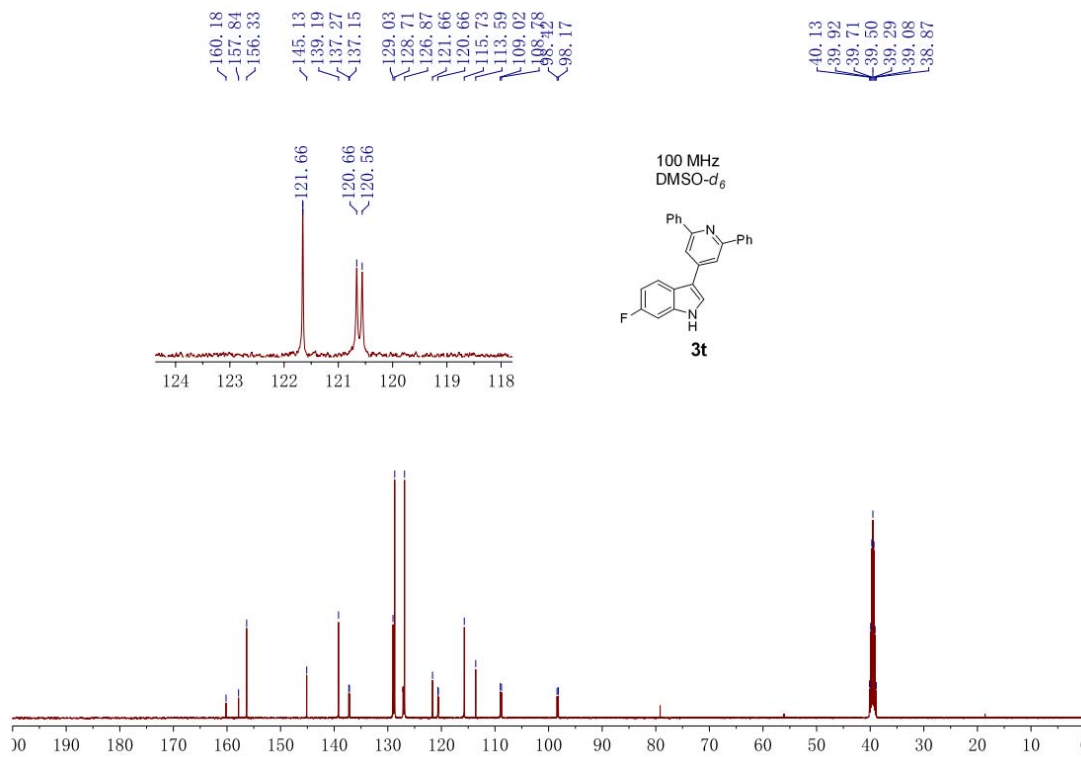

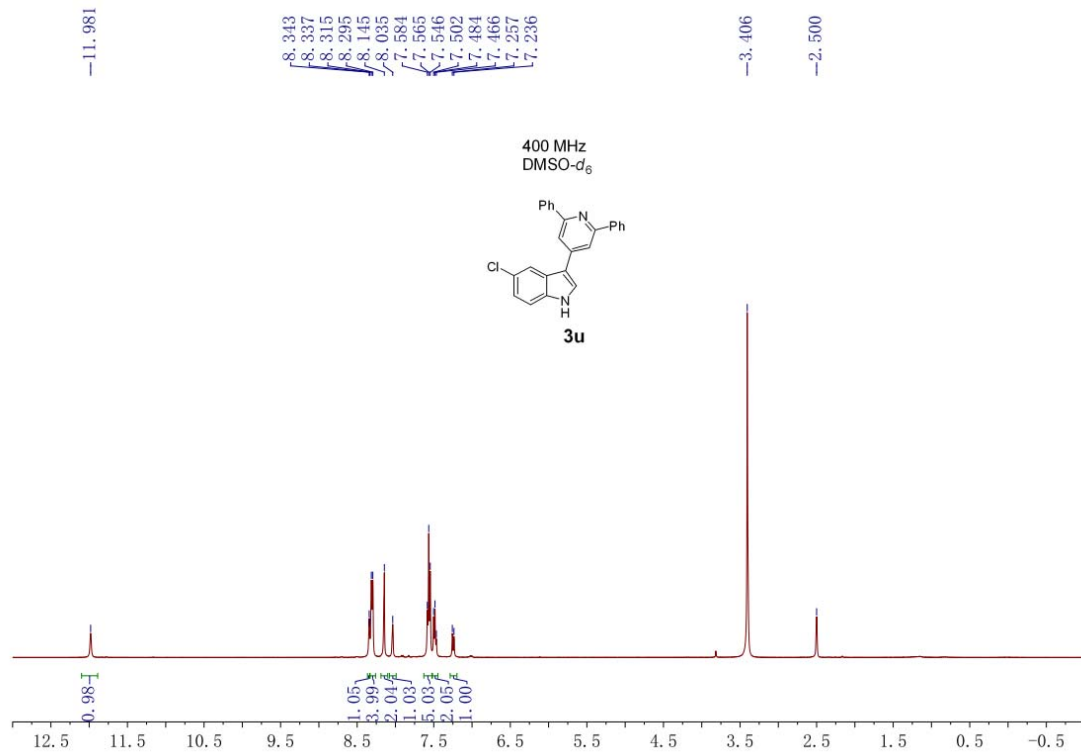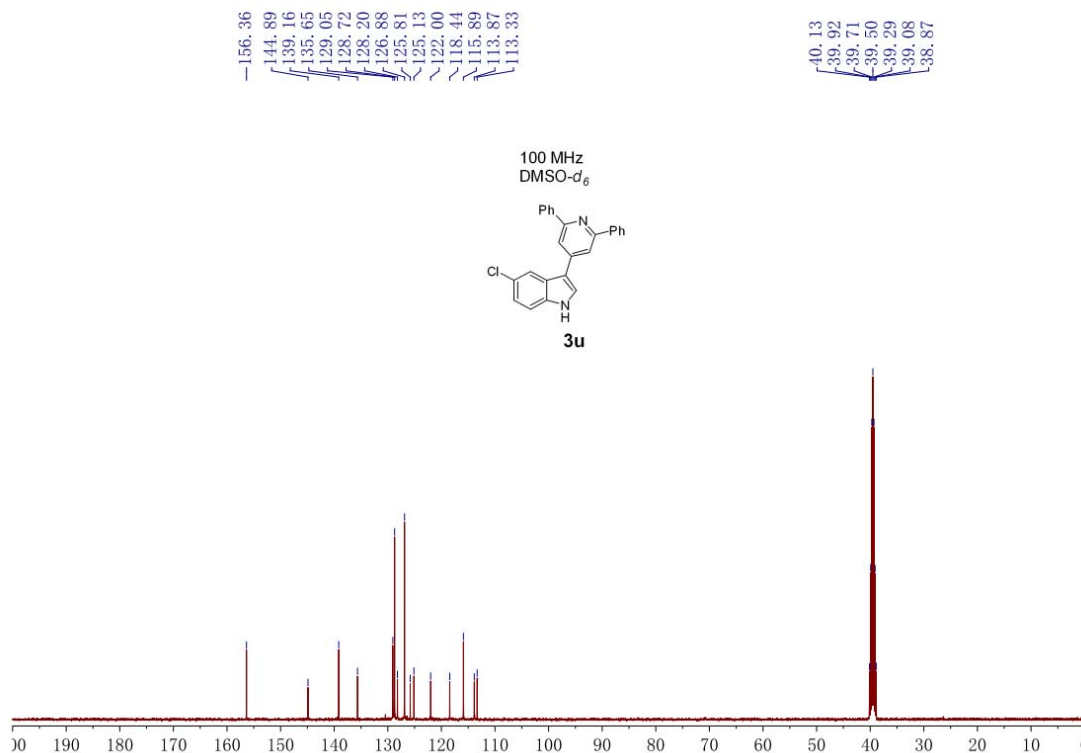



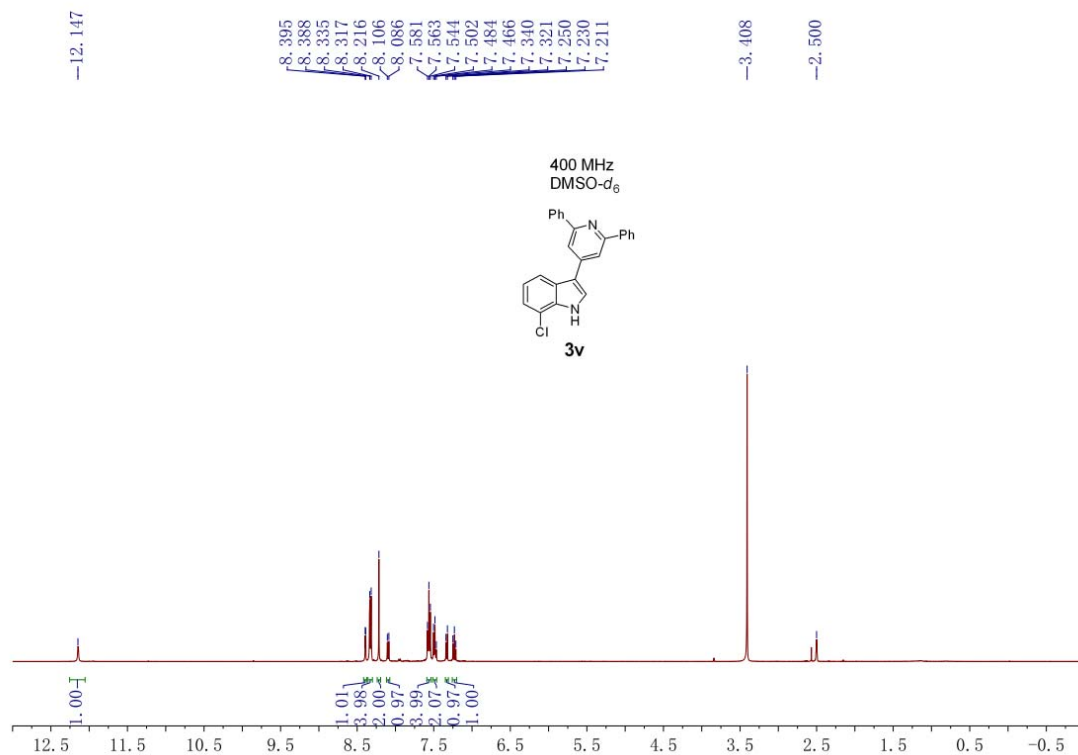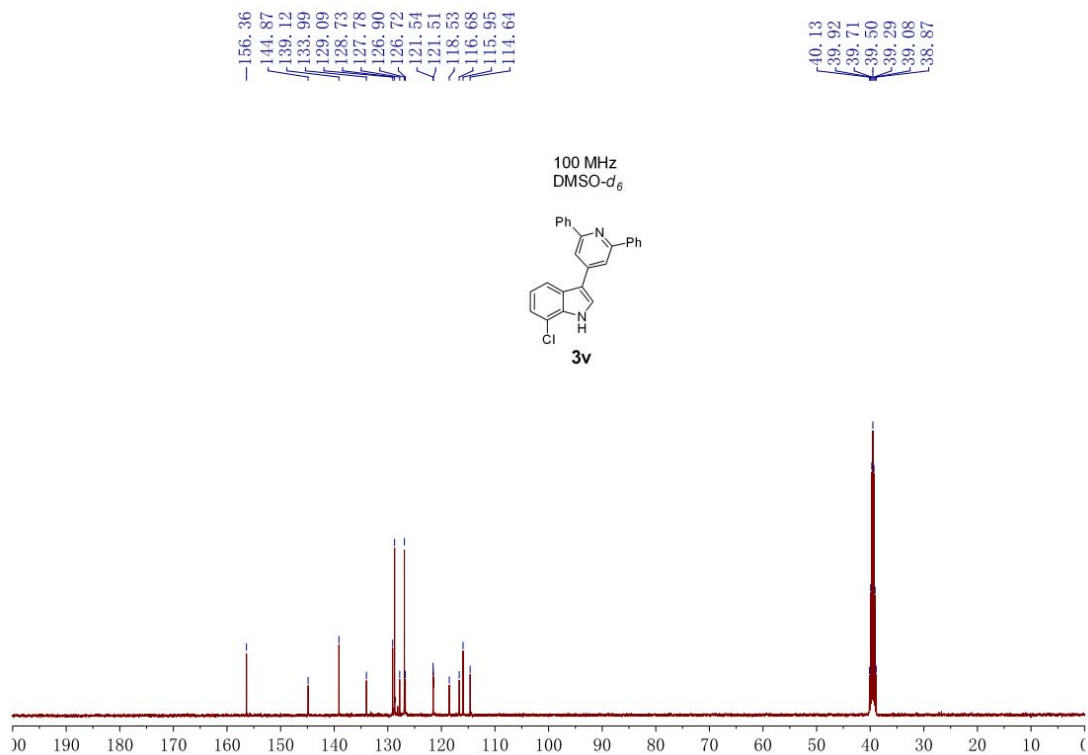

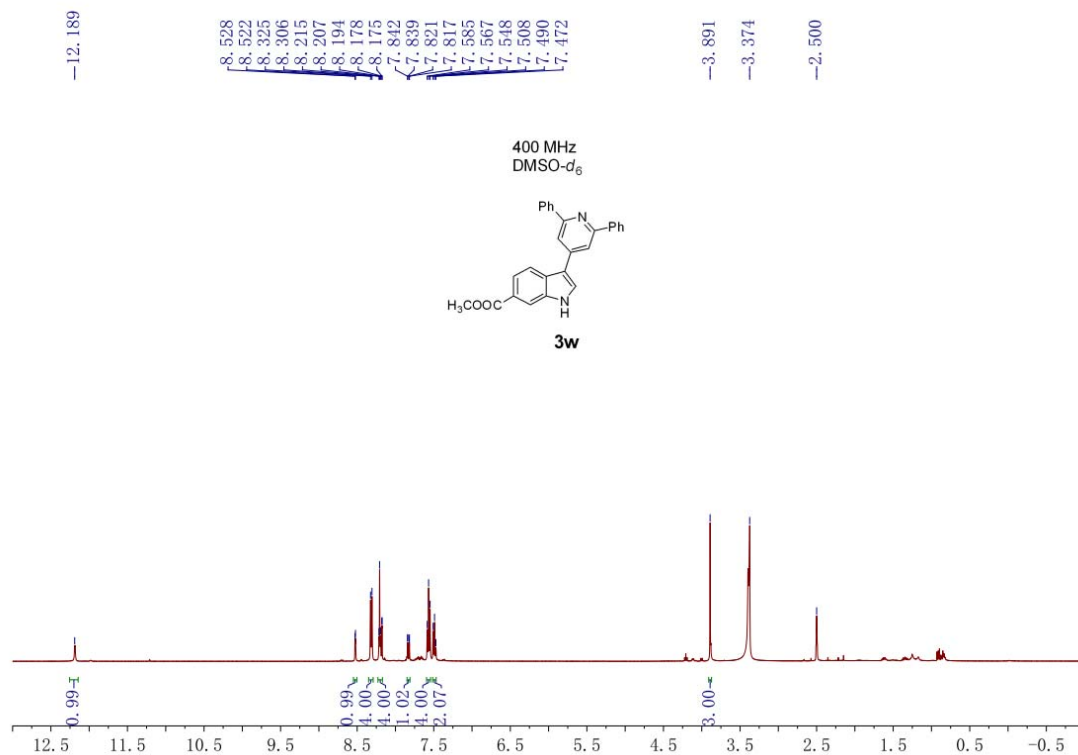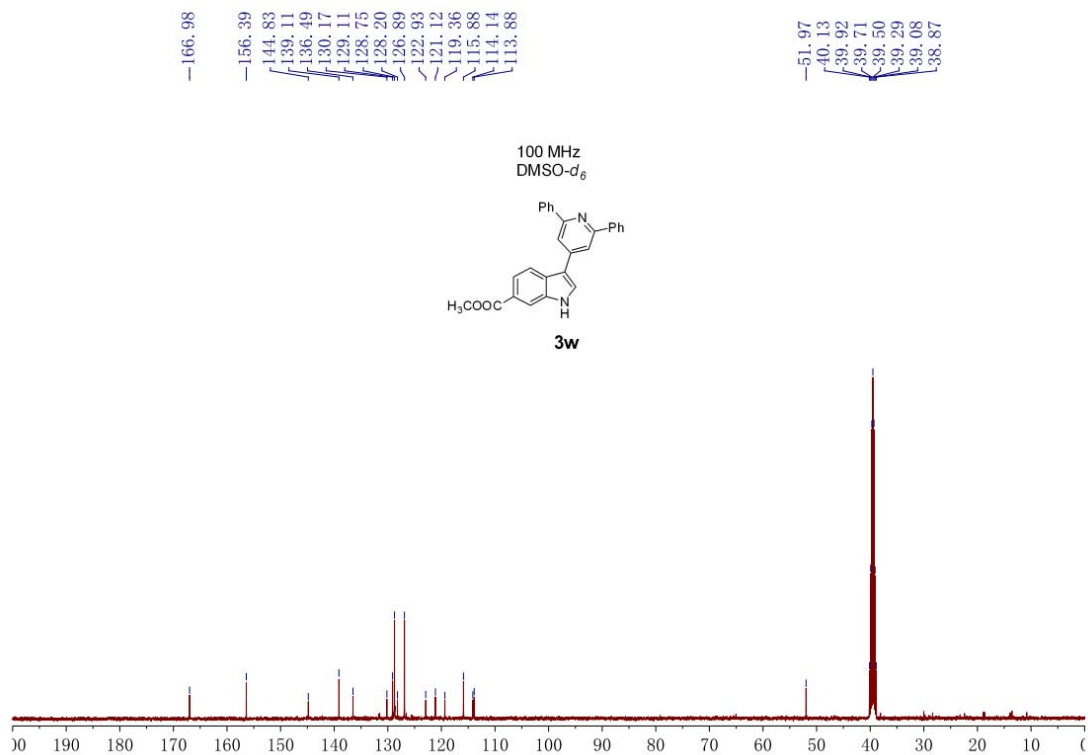

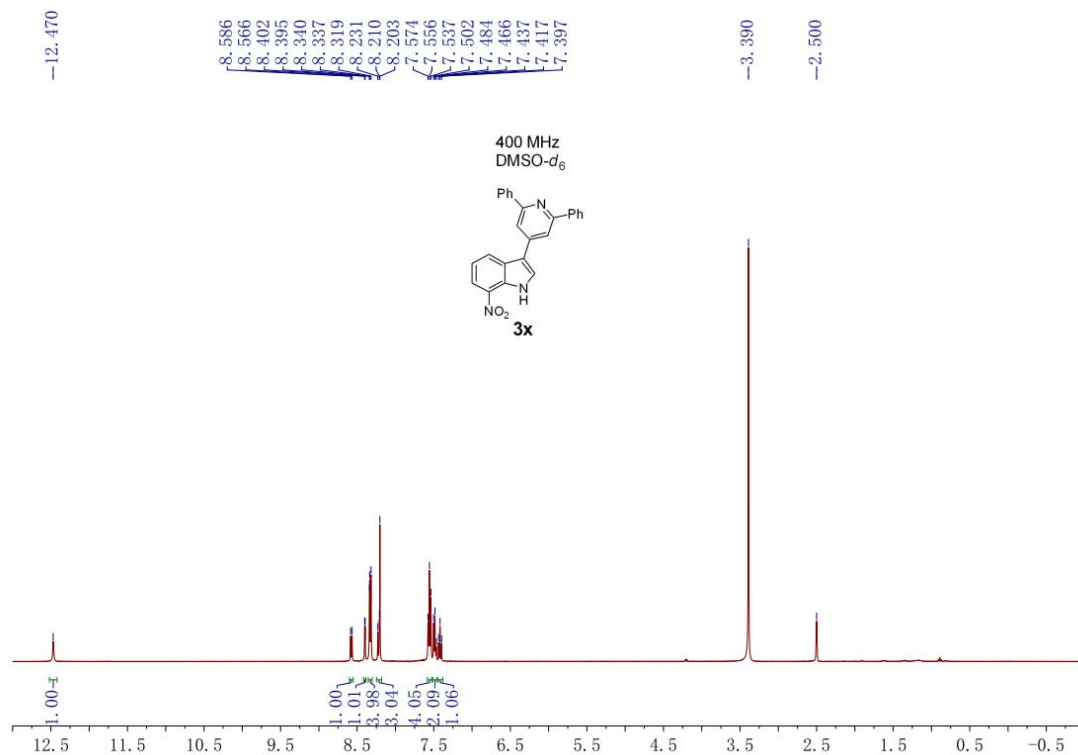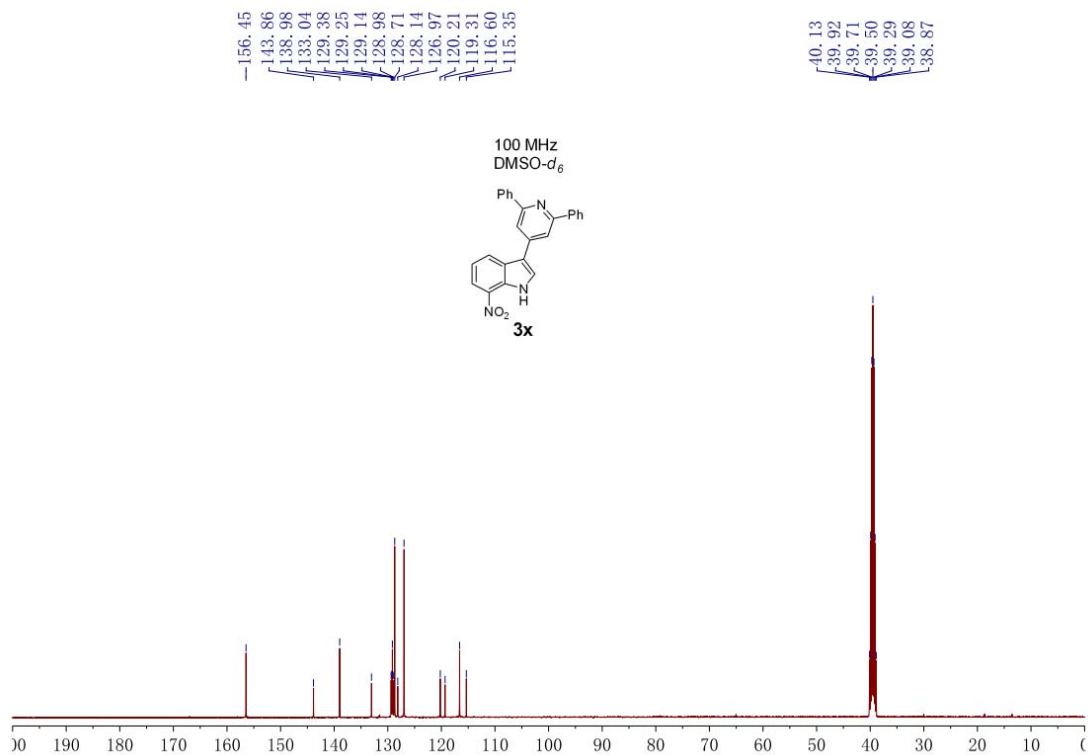

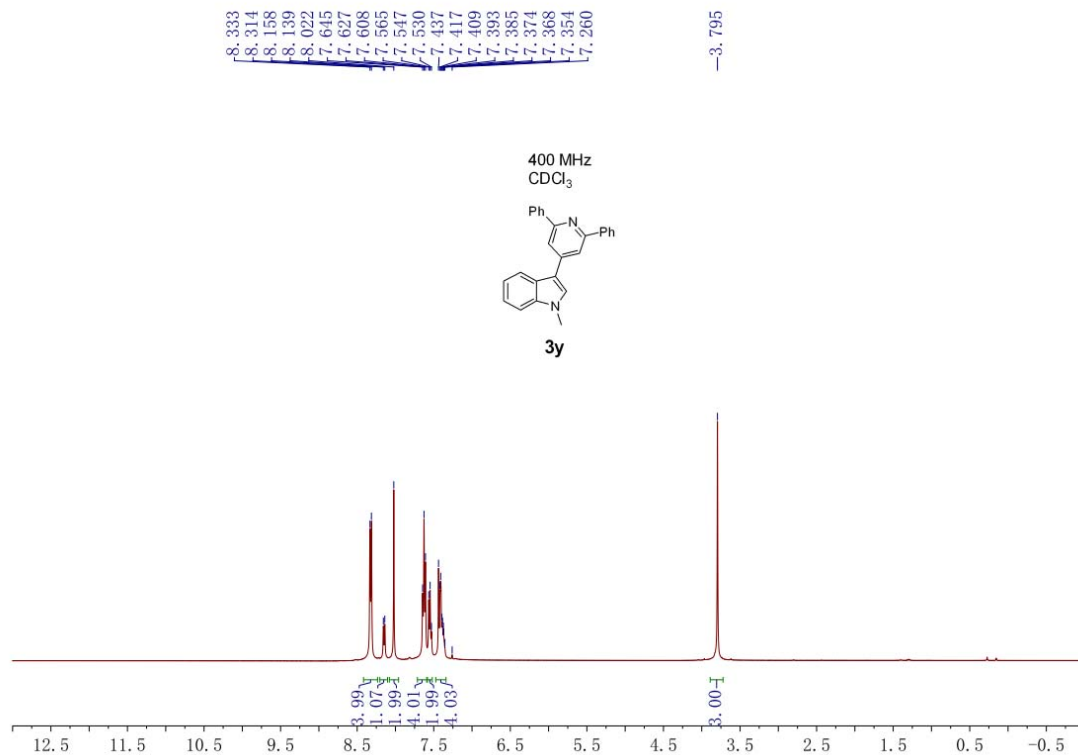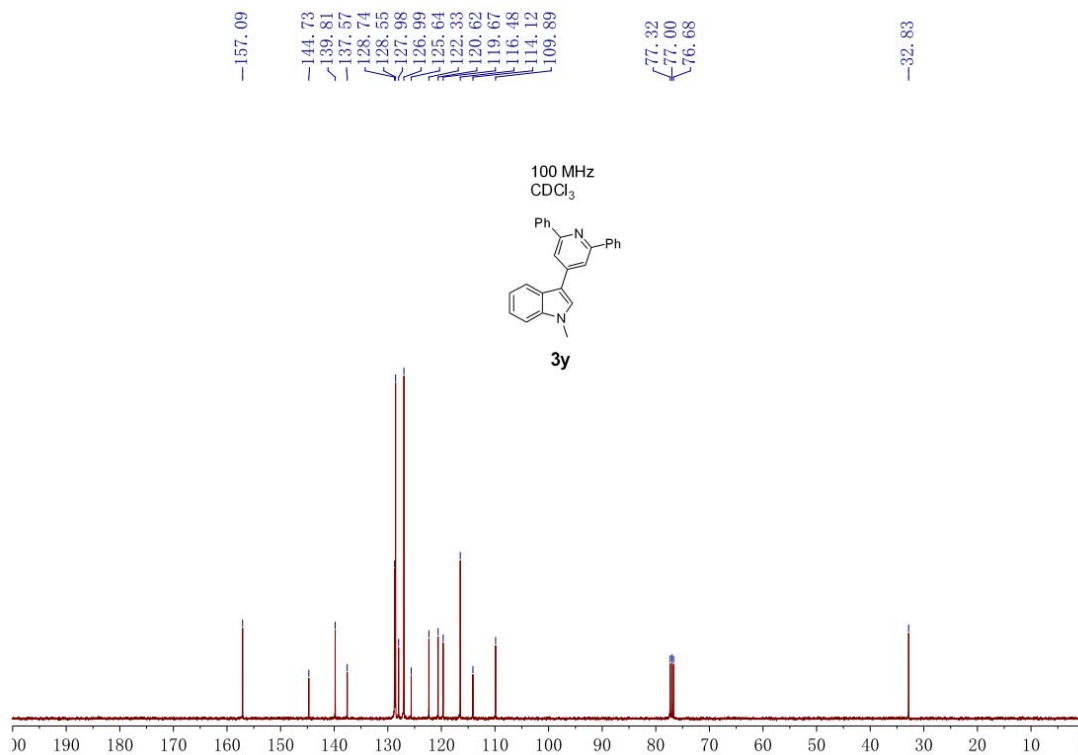

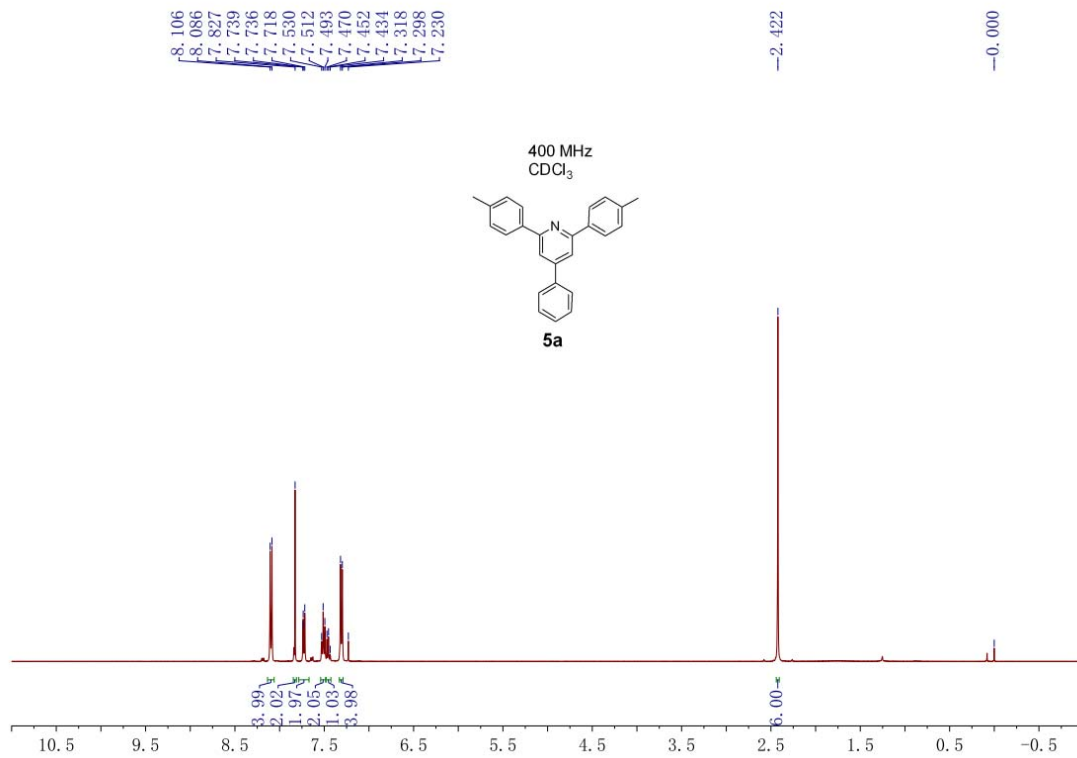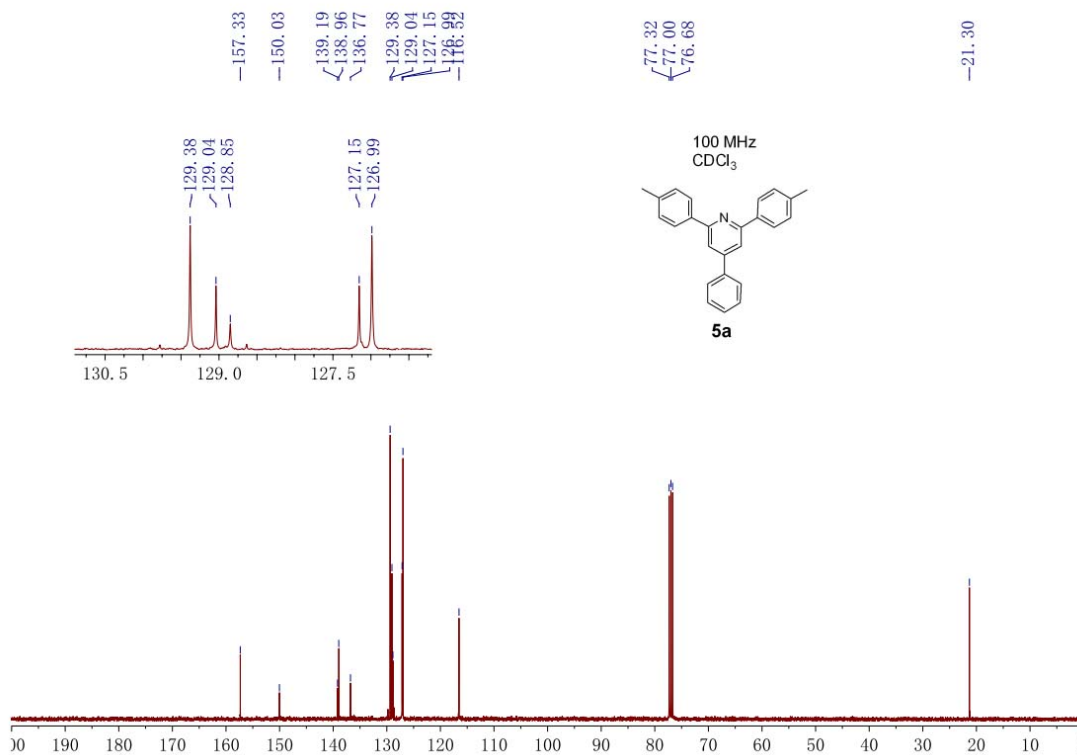

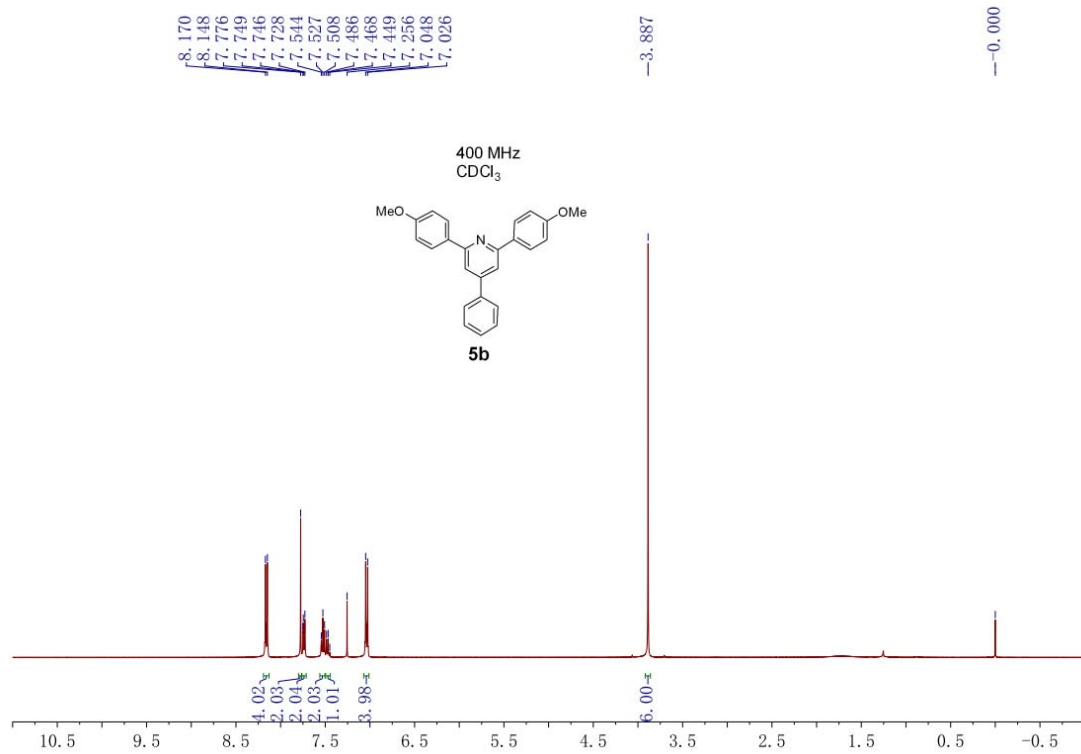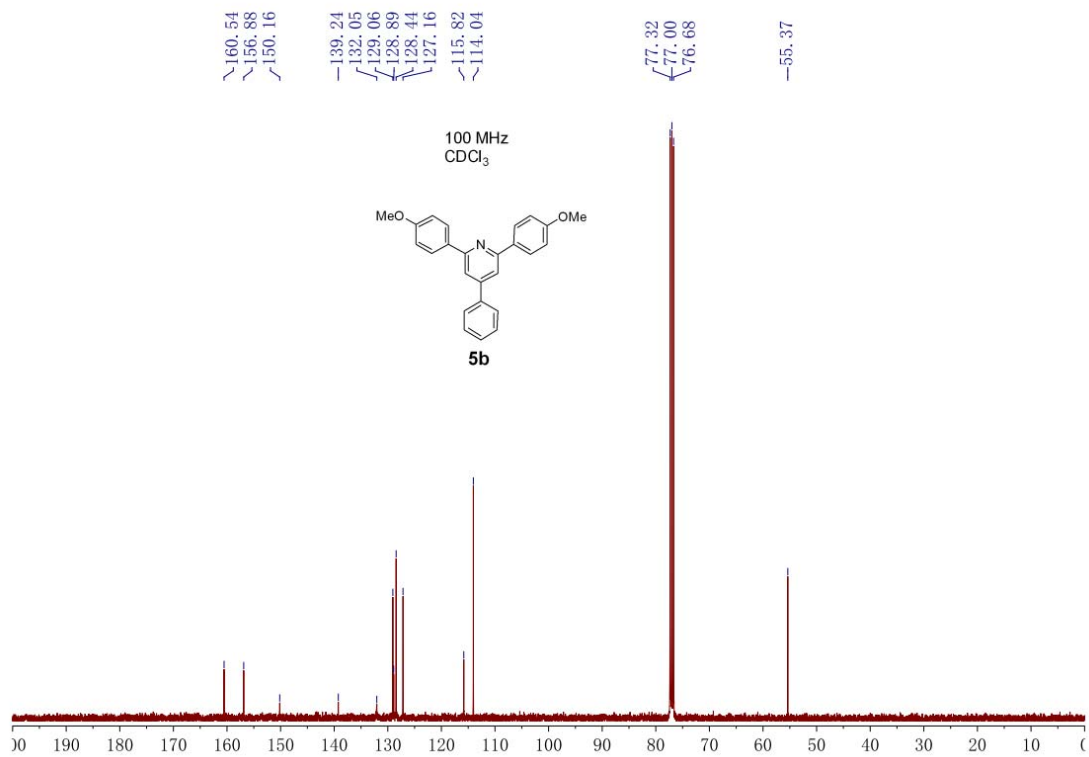

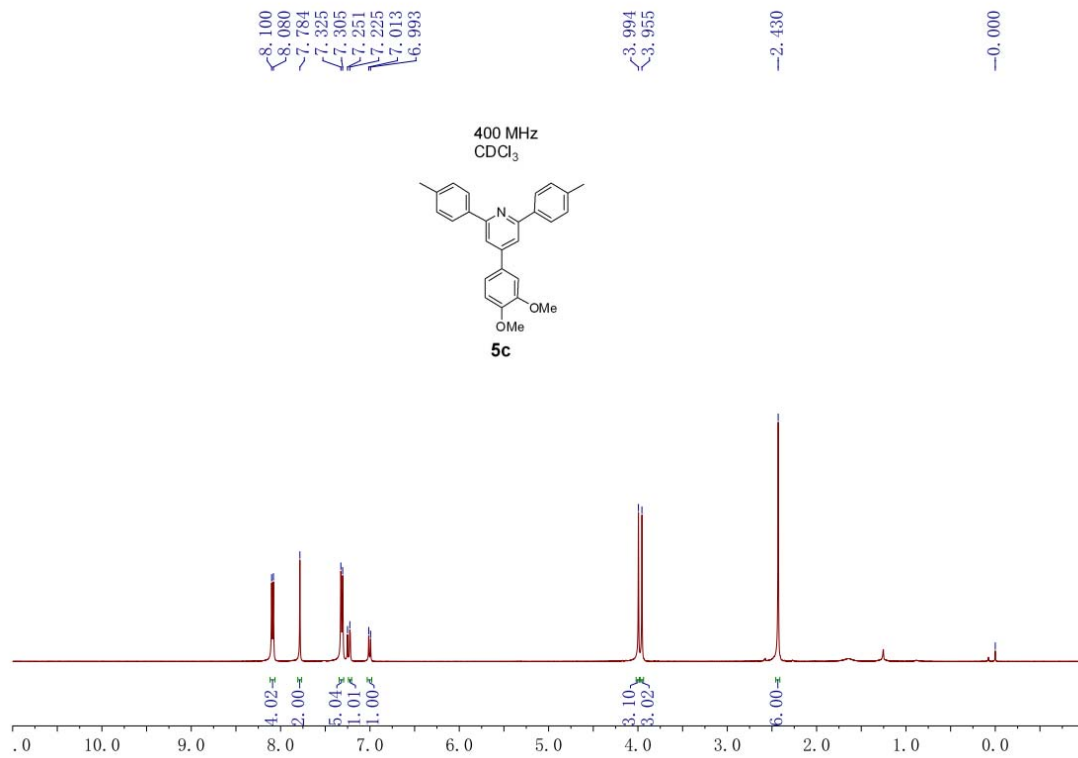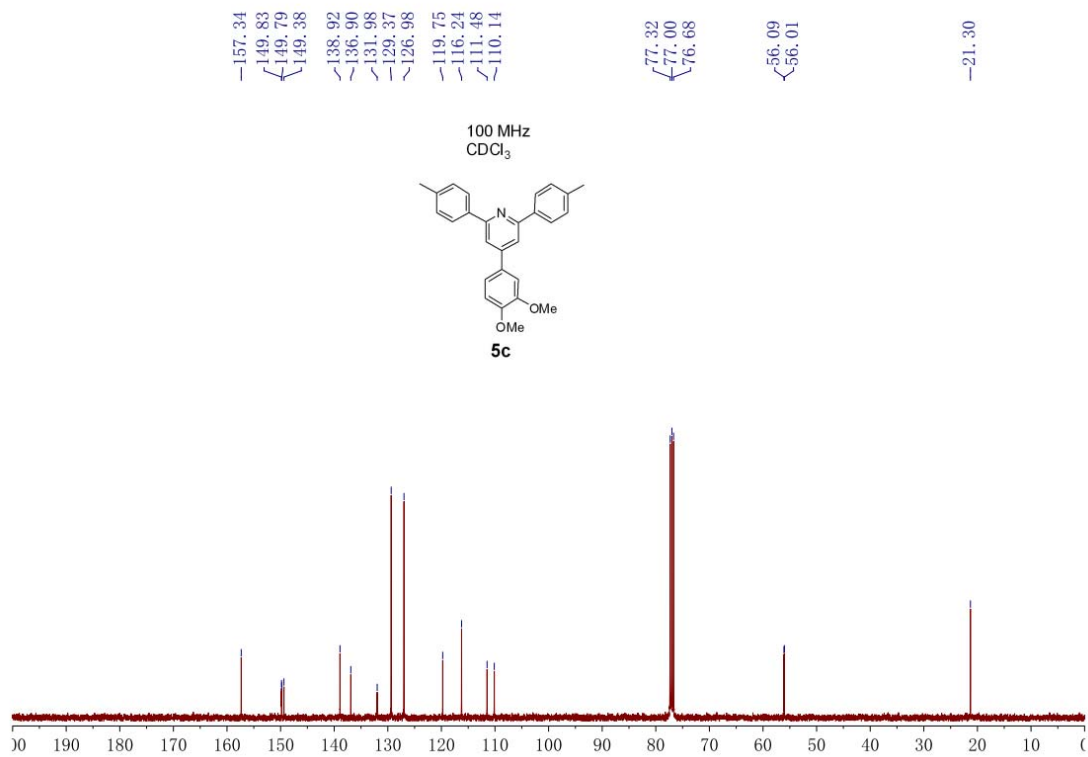

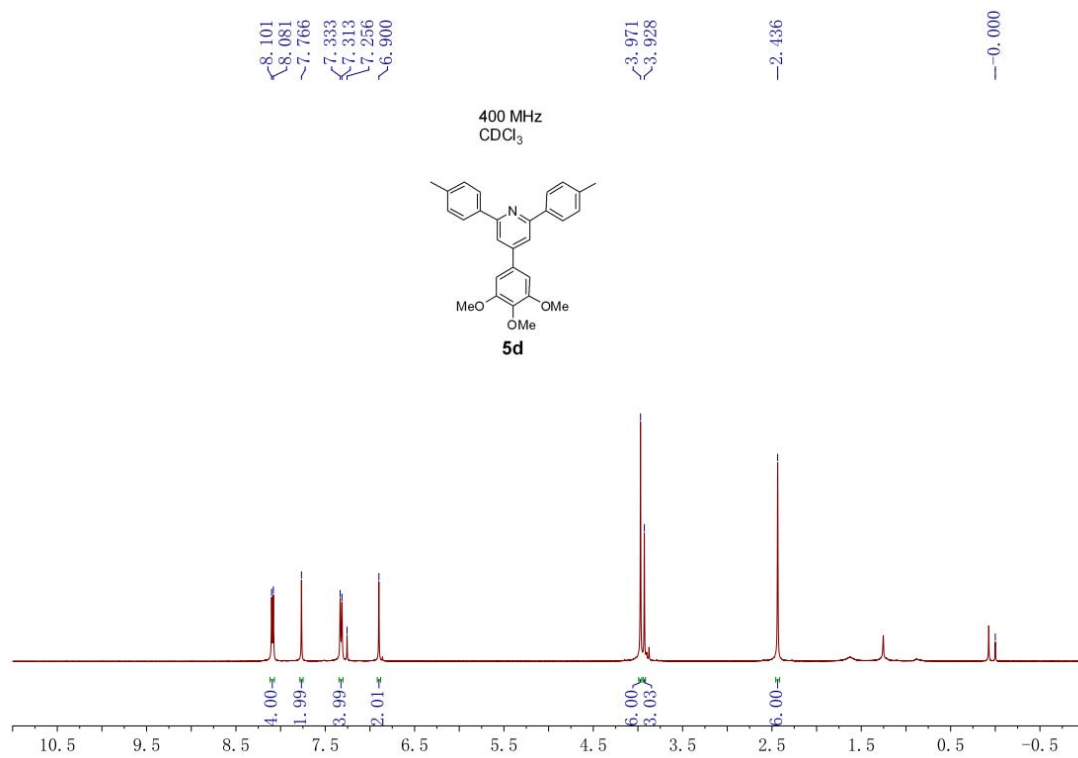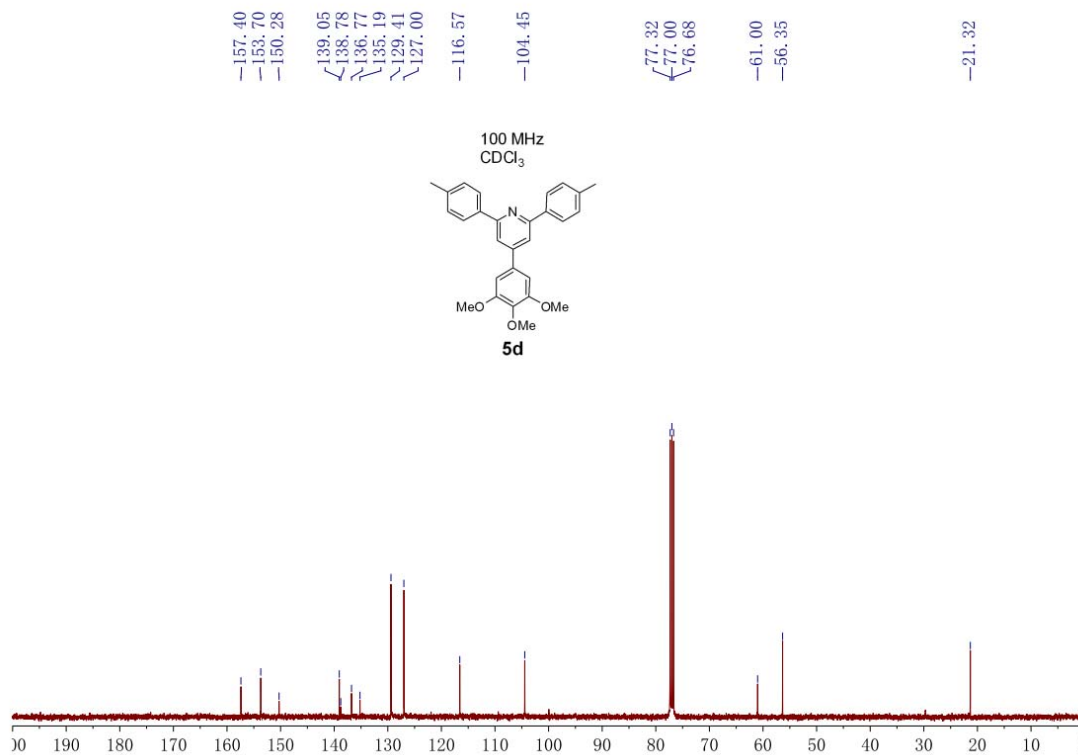



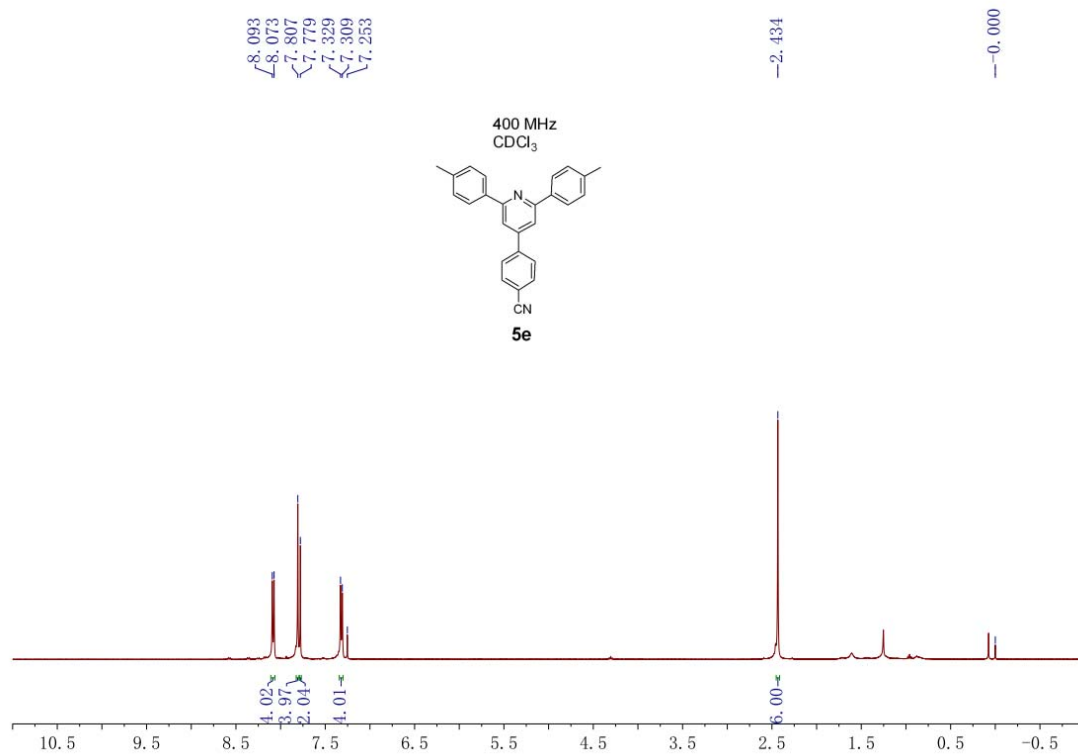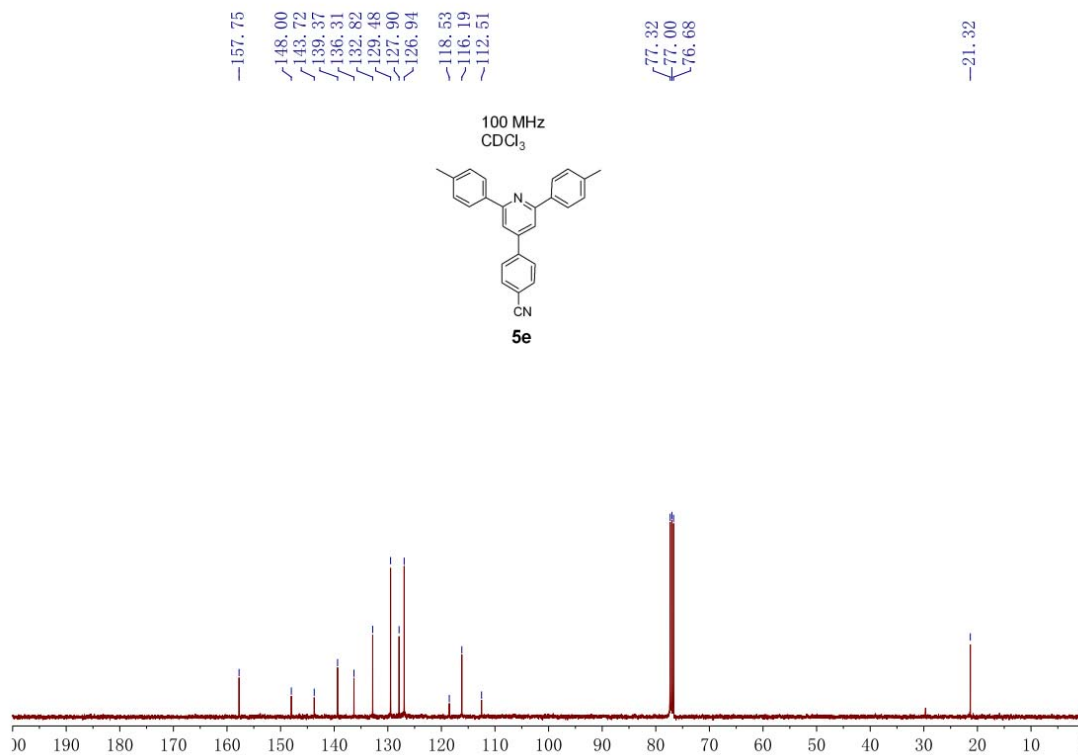

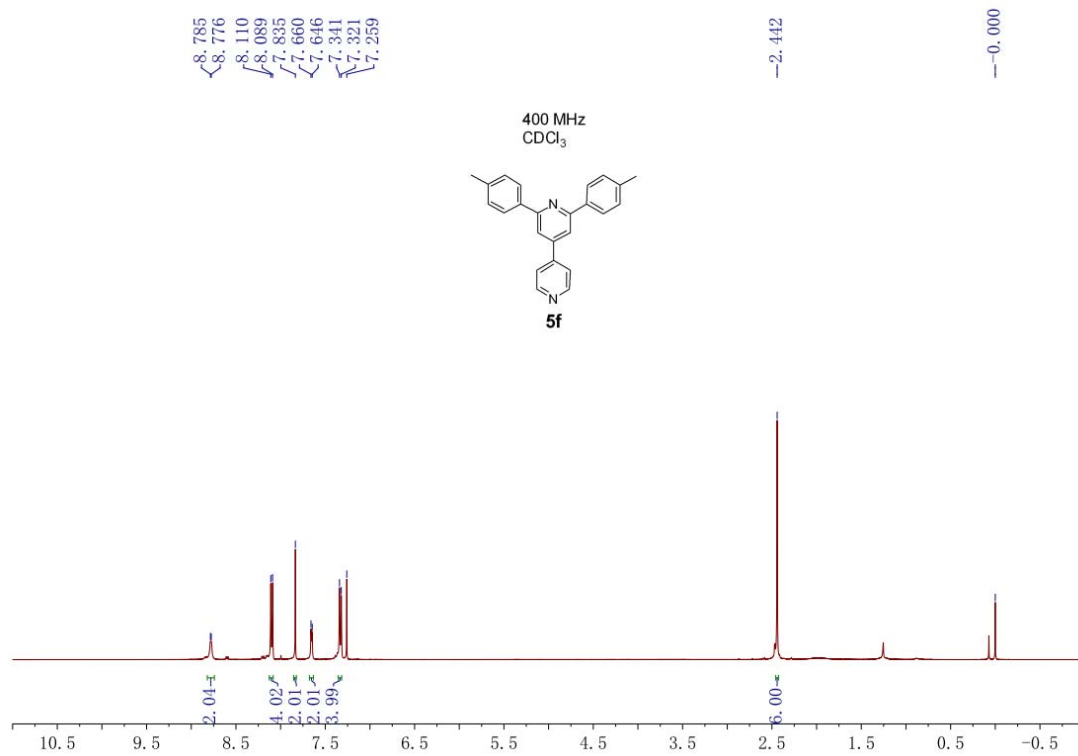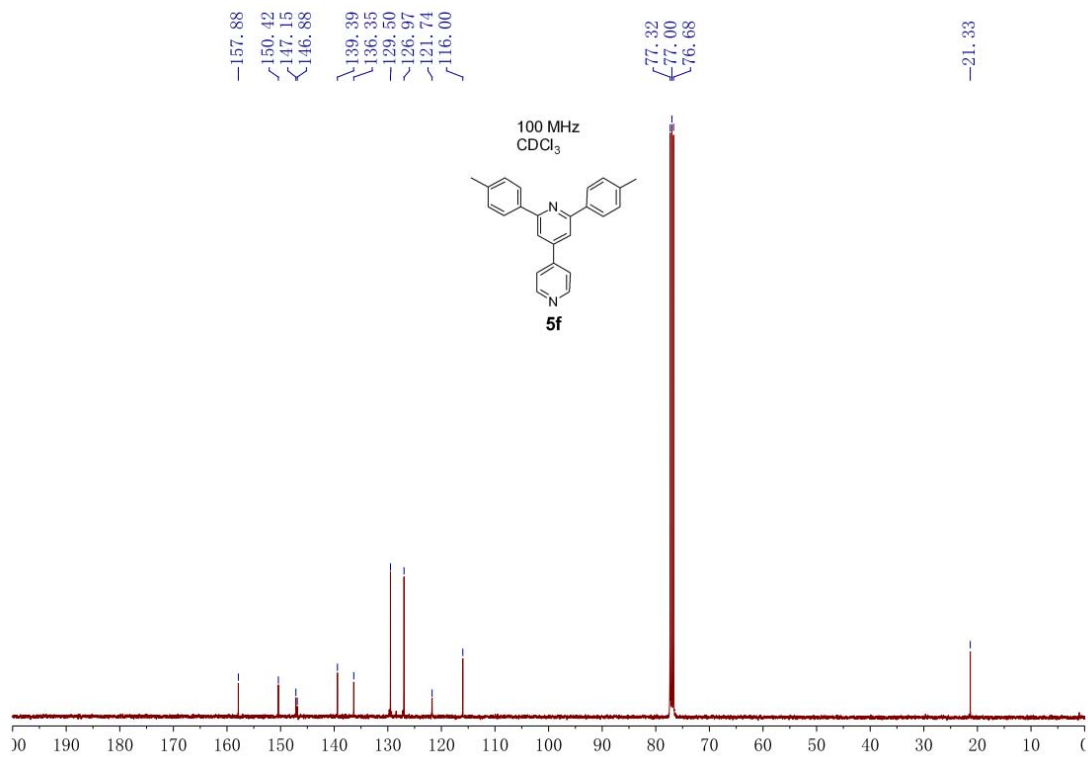

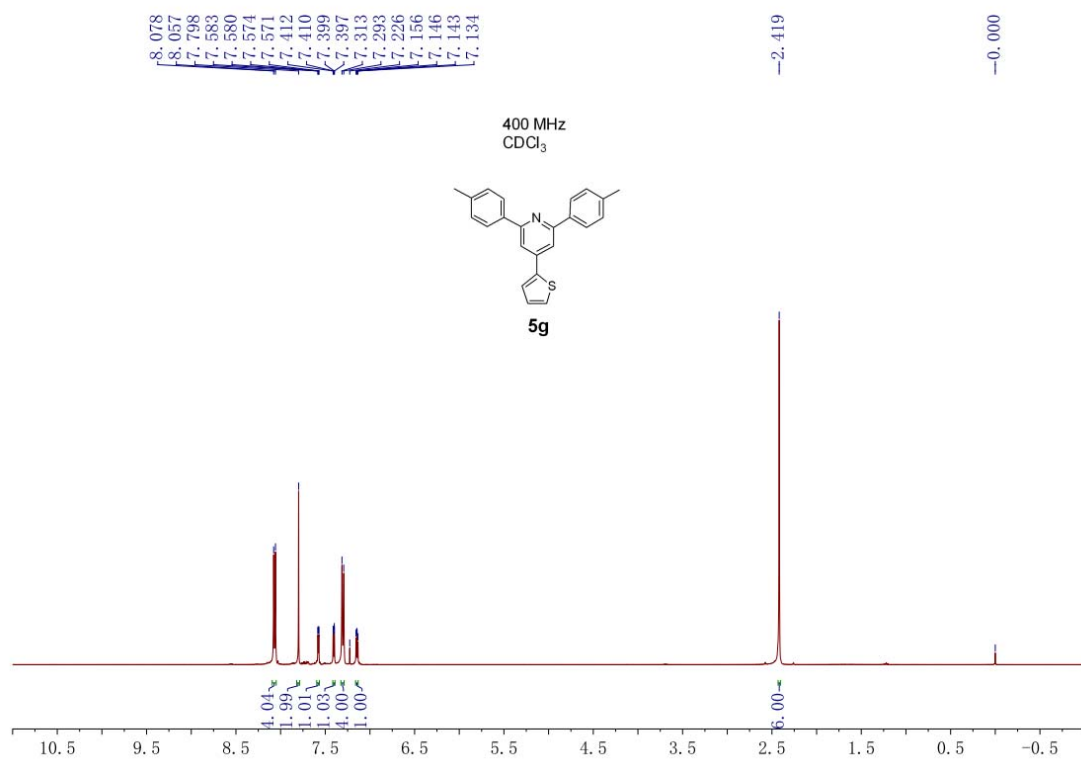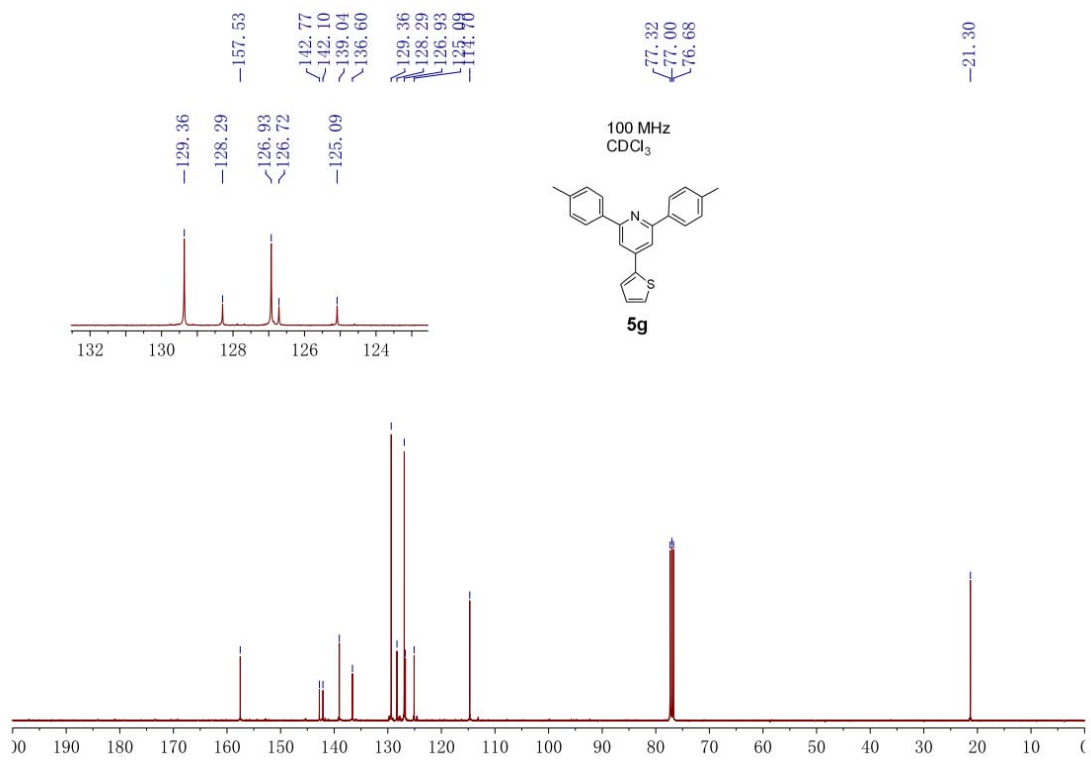

Supplement: c8ob02230e1.pdf [file c8ob02230e1.pdf]
